# Supplementary material for: Rationally modified SNX-class Hsp90 inhibitors disrupt extracellular fibronectin assembly without intracellular Hsp90 activity
Source: Royal Society of Chemistry journal article supplement (doi:10.1039/d4md00501e), 2024-01-01

## Rationally modified SNX-class Hsp90 inhibitors disrupt extracellular fibronectin assembly without intracellular Hsp90 activity

### Supplementary data

#### Chemistry

##### General experimental procedures

Solvents and commercially available reagents used for this project were purchased from Honeywell or Sigma-Aldrich and used without further purification. All reactions that included the use of air and/or moisture sensitive reagents were carried out under an inert atmosphere of nitrogen using oven-dried glassware and anhydrous solvents. Infrared (IR) spectral data was obtained using an Alpha II FTIR spectrometer and the IR data is reported as absorption frequency ( $\text{cm}^{-1}$ ). All nuclear magnetic resonance (NMR) spectra were recorded either on a Bruker 400 MHz or 500 MHz UltraShield NMR spectrometer.  $^1\text{H}$  and  $^{13}\text{C}$  NMR chemical shifts are listed in ppm referenced against the NMR solvent as the internal standard ( $\text{CDCl}_3$ :  $\delta$  7.26, 77.16;  $\text{CD}_3\text{OD}$ :  $\delta$  3.31, 49.00;  $(\text{CD}_3)_2\text{SO}$ :  $\delta$  2.50, 39.52;  $(\text{CD}_3)_2\text{CO}$ :  $\delta$  2.05, 29.84). NMR spectral data is reported as: chemical shift, integration, multiplicity (b = broad, s = singlet, d = doublet, t = triplet, q = quartet, m = multiplet) and coupling constants ( $J$ ) in Hertz (Hz). High resolution mass spectrometric (HRMS) data was obtained using a Waters Synapt G2 TOF instrument with an ESI source. All data were reported in  $m/z$  values.

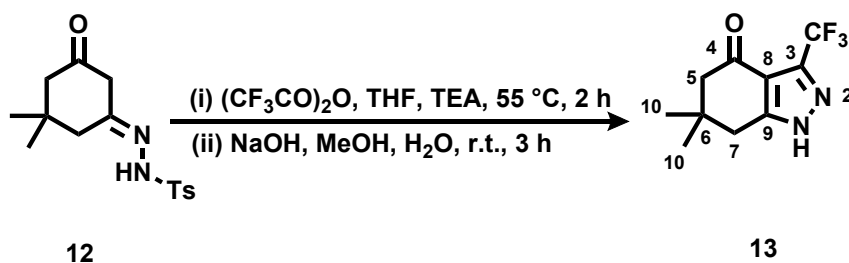

Trifluoroacetic anhydride (0.220 mL, 1.59 mmol, 1.0 eq.) was added to a suspension of **12** (500 mg, 1.59 mmol, 1.0 eq.) and TEA (2.88 mL, 20.7 mmol, 13.0 eq.) in THF (9 mL). The reaction mixture was heated to 55 °C to give an orange solution which was stirred for 2 hours. After cooling to room temperature, the mixture was quenched with sat.  $\text{NH}_4\text{Cl}$  (20 mL) and extracted with EtOAc (3 x 20 mL). The combined organic fractions were washed with sat. brine (20 mL), dried over anhydrous  $\text{MgSO}_4$ , concentrated in *vacuo* to yield an orange-brown oil which was purified with silica gel chromatography to yield **13** as an orange-yellow solid.

**6,6-Dimethyl-3-(trifluoromethyl)-1,5,6,7-tetrahydro-4H-indazol-4-one (13)**: orange-yellow solid (166 mg, 45% yield over two step); IR ( $\nu_{\text{max}}$   $\text{cm}^{-1}$ ) 3230, 3124, 2961, 1665, 1511, 1482;  $^1\text{H}$  NMR (DMSO, 500 MHz):  $\delta_{\text{H}}$  13.86 (1H, s, NH-1), 2.80 (2H, s, H-6), 2.37 (2H, s, H-4), 1.04 (6H, s, H-7);  $^{13}\text{C}$  NMR (DMSO, 125 MHz):  $\delta_{\text{C}}$  190.0 (CO, C-3), 152.0 (q<sub>c</sub>, C-1), 138.9 (q<sub>c</sub>, q,  $J$  = 38.7 Hz, C-10), 120.9 (CF<sub>3</sub>, q,  $J$  = 269.5 Hz, C-11), 113.5 (q<sub>c</sub>, C-2), 52.1 (CH<sub>2</sub>, C-4), 35.3 (q<sub>c</sub>, C-5), 33.7 (CH<sub>2</sub>, C-6), 27.6 (CH<sub>3</sub>, C-7) ppm.

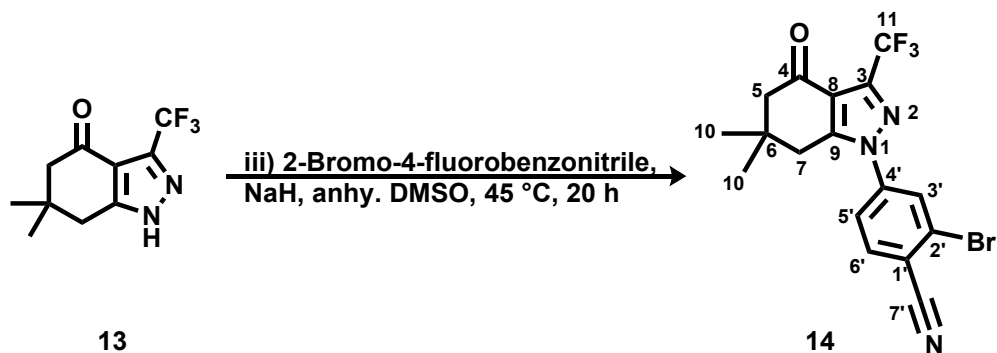

A solution of **13** (349 mg, 1.50 mmol, 1.0 eq.) in anhydrous DMSO (7 mL) was treated with NaH (60.0 mg, 1.50 mmol, 1.0 eq.) and stirred for 15 minutes. Thereafter, 2-bromo-4-fluorobenzonitrile (480 mg, 2.40 mmol, 1.6 eq.) was added and the reaction mixture was stirred at 45 °C for 20 hours. Thereafter, the reaction mixture was cooled to room temperature, quenched with sat.  $\text{NH}_4\text{Cl}$ , diluted with water and washed with EtOAc (x 3). The combined organic layers were washed with sat. brine, dried over anhydrous  $\text{MgSO}_4$ , filtered and concentrated *in vacuo* to give a brown crude material which was purified using silica gel chromatography to give **14** as an orange-yellow solid (353 mg, 0.856 mmol, 57% yield).

**2'-Bromo-4'-(6,6-dimethyl-4-oxo-3-(trifluoromethyl)-4,5,6,7-tetrahydro-1H-indazol-1-yl) benzonitrile (14)**: orange-yellow solid (57% yield); IR ( $\nu_{\text{max}}$   $\text{cm}^{-1}$ ) 2963, 2951, 2925, 2870, 2854, 2233, 1682, 1593;  $^1\text{H}$  NMR (DMSO, 400 MHz):  $\delta_{\text{H}}$  8.21 – 8.18 (2H, m, H-6', H-3'), 7.92 – 7.89 (1H, dd,  $J = 8.5, 2.1$  Hz, H-5'), 3.05 (2H, s, H-7), 2.45 (2H, s, H-5), 1.05 (6H, s, 2 x  $\text{CH}_3$ );  $^{13}\text{C}$  NMR (DMSO, 100 MHz):  $\delta_{\text{C}}$  190.1 ( $q_{\text{C}}$ , C-4), 152.9 ( $q_{\text{C}}$ , C-9), 141.4 ( $q_{\text{C}}$ , C-4'), 139.4 ( $q_{\text{C}}$ , q,  $J = 39.1$  Hz, C-3), 136.0 (CH, C-6'), 128.3 (CH, C-3'), 125.5 ( $q_{\text{C}}$ , C-2'), 123.8 (CH, C-5'), 120.4 ( $q_{\text{C}}$ , q,  $J = 270.7$  Hz, C-11), 116.6 ( $q_{\text{C}}$ , C-8), 115.9 (CN, C-7'), 114.8 ( $q_{\text{C}}$ , C-1'), 51.6 ( $\text{CH}_2$ , C-5), 35.5 ( $q_{\text{C}}$ , C-6), 35.3 ( $\text{CH}_2$ , C-7), 27.5 (2 x  $\text{CH}_3$ , C-10).

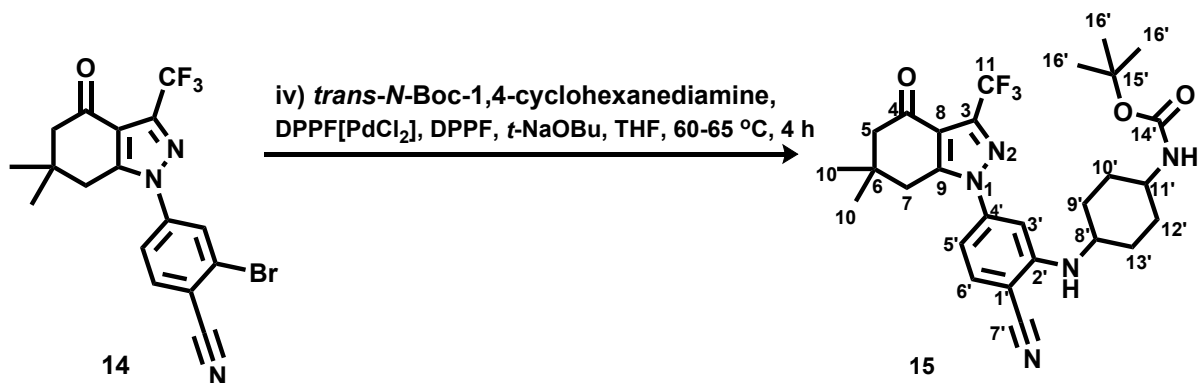

DPPF[ $\text{PdCl}_2$ ] (5 mol%) and DPPF (10 mol%) were consecutively added to a solution of **14** (333 mg, 0.809 mmol, 1.0 eq.) and  $\text{Na}^t\text{OBu}$  (155 mg, 1.62 mmol, 2.0 eq.) in anhydrous THF (4.5 mL) to give a reddish-brown suspension. Thereafter, *trans*-N-Boc-1,4-cyclohexanediamine (520 mg, 2.43 mmol, 3.0 eq.) was added and the reaction mixture was stirred between 60 – 65 °C. After 30 min TLC analysis indicated only the presence of a spot with an  $R_{\text{f}}$  value similar to the starting material, however, it was fluorescent purple spot under UV. The reaction was stopped, filtered through a flash silica plug, concentrated *in vacuo*. The resulting suspension was purified using silica gel chromatography to obtain **15** as an off-white solid.

**tert-Butyl(4-((2-cyano-5-(6,6-dimethyl-4-oxo-3-(trifluoromethyl)-4,5,6,7-tetrahydro-1H-indazol-1-yl)phenyl)amino)cyclohexyl)carbamate (15)**: off-white solid (287 mg, 65% yield);  $^1\text{H}$  NMR ( $\text{CDCl}_3$ , 400 MHz):  $\delta_{\text{H}}$  7.51 (1H, d,  $J = 8.3$  Hz, H-6'), 6.81 (1H, d,  $J = 1.8$  Hz, H-3'), 6.70-6.67 (1H, dd,  $J = 8.3, 1.9$  Hz, H-5'), 4.66

(1H, d,  $J = 7.7$  Hz, NH), 4.43 – 4.39 (2H, m, NH), 3.54 – 3.46 (1H, 3, H-11'), 3.40 – 3.32 (2H, m, H-8'), 2.83 (2H, s, H-7), 2.47 (2H, s, H-5), 2.17 – 2.10 (4H, m), 2.00 – 1.99 (2H, m), 1.43 (18H, 2 x s, H-16'), 1.38 – 1.15 (6H, m), 1.13 (6H, s, H-10);  $^{13}\text{C}$  NMR ( $\text{CDCl}_3$ , 100 MHz):  $\delta_{\text{C}}$  189.8 (CO, C-4), 155.4 (CO, C-14'), 150.7 (q<sub>C</sub>, C-8), 150.3 (q<sub>C</sub>, C-2'), 142.6 (q<sub>C</sub>, C-4'), 141.1 (q<sub>C</sub>, q,  $J = 39.3$  Hz, C-3), 134.3 (CH, C-6'), 120.4 (CF<sub>3</sub>, q,  $J = 270.1$  Hz, C-11), 116.8 (q<sub>C</sub>, C-9), 116.7 (CN, C-7'), 111.1 (CH, C-5'), 106.6 (CH, C-3'), 96.5 (q<sub>C</sub>, C-1'), 79.3 (q<sub>C</sub>, C-15'), 52.4 (CH<sub>2</sub>, C-5), 51.4 (CH, C-8'), 49.1 (CH, C-11'), 37.5 (CH<sub>2</sub>, C-7), 35.8 (q<sub>C</sub>, C-6), 32.2 (2 x CH<sub>2</sub>), 31.6 (2 x CH<sub>2</sub>), 28.5 (3 x CH<sub>3</sub>, C-16'), 28.4 (2 x CH<sub>3</sub>, C-10) ppm.

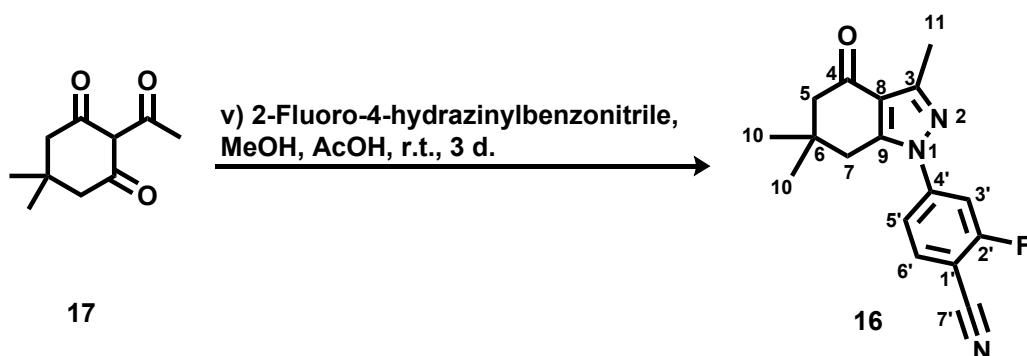

An orange solution of **17** (503 mg, 2.76 mmol, 1.0 eq.) and 2-fluoro-4-hydrazinylbenzonitrile (417 mg, 2.76 mmol, 1.0 eq.) in MeOH (1.70 mL) was treated with acetic acid (40.0  $\mu\text{L}$ , 0.690 mmol, 0.25 eq.) and stirred at room temperature for 5 days. Thereafter, the reaction mixture was concentrated *in vacuo* and purified using silica gel chromatography to get the desired product **16** as an off-white solid.

**2'-Fluoro-4'-(3,6,6-trimethyl-4-oxo-4,5,6,7-tetrahydro-1H-indazol-1-yl)-benzonitrile (16)**: off-white solid (279 mg, 67% yield); IR ( $\nu_{\text{max}}$   $\text{cm}^{-1}$ ) 2962, 2937, 2873, 2229, 1669, 1617;  $^1\text{H}$  NMR ( $\text{CDCl}_3$ , 400 MHz):  $\delta_{\text{H}}$  7.76 – 7.73 (1H, dd,  $J = 8.5, 7.0$  Hz, H-6'), 7.52 – 7.45 (2H, m, H-3' and H-5'), 2.87 (2H, s, H-7), 2.53 (3H, s, H-11), 2.42 (2H, s, H-5), 1.13 (6H, s, H-10);  $^{13}\text{C}$  NMR ( $\text{CDCl}_3$ , 100 MHz):  $\delta_{\text{C}}$  193.2 (CO, C-4), 163.6 (CF, d,  $J = 260.7$  Hz, C-2'), 151.5 (CH, C-3), 149.4 (q<sub>C</sub>, C-9), 144.1 (q<sub>C</sub>, d,  $J = 10.6$  Hz, C-4'), 134.4 (CH, d,  $J = 1.6$  Hz, C-6'), 118.6 (q<sub>C</sub>, C-8), 118.5 (CH, C-5'), 113.3 (CN, C-7'), 111.1 (CH, d,  $J = 23.7$  Hz, C-3'), 100.1 (q<sub>C</sub>, d,  $J = 15.7$  Hz, C-1'), 52.3 (CH<sub>2</sub>, C-5), 38.0 (CH<sub>2</sub>, C-7), 36.1 (q<sub>C</sub>, C-6), 28.5 (2 x CH<sub>3</sub>, C-10), 13.5 (CH<sub>3</sub>, C-11) ppm.

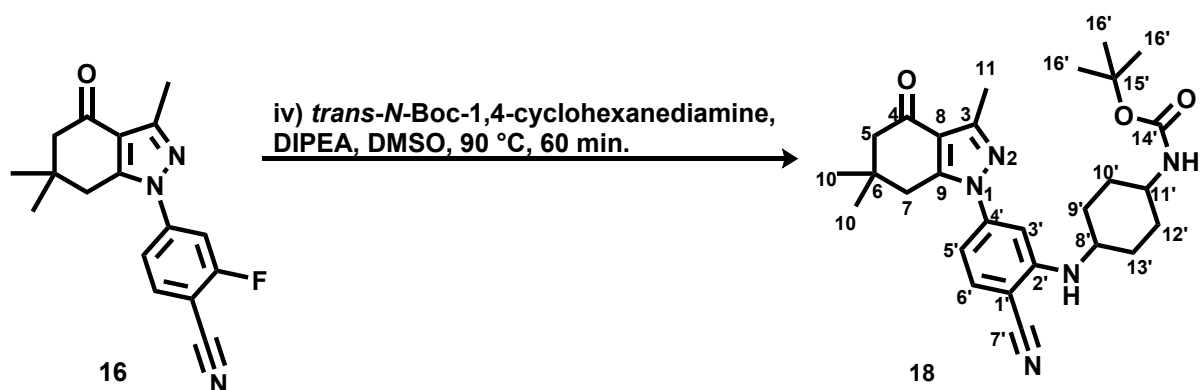

**16** (79.0 mg, 0.225 mmol, 1.0 eq.) and *trans*-*N*-Boc-1,4-cyclohexanediamine (193 mg, 0.900 mmol, 4.0 eq.) were dissolved in DMSO (1 mL) and treated with DIPEA (120  $\mu\text{L}$ , 0.675 mmol, 3.0 eq.). The reaction mixture was

heated to 90 °C and stirred for 1 hour to give a black reaction mixture. The crude reaction mixture was purified using silica gel chromatography to obtain **18** as an off-white solid.

**tert-Butyl(4-((2-cyano-5-(3,6,6-trimethyl-4-oxo-4,5,6,7-tetrahydro-1H-indazol-1-yl)phenyl)amino)cyclohexyl)carbamate (18):** Off-white solid (82 mg, 74% yield); IR ( $\nu_{\max}$  cm<sup>-1</sup>) 3399, 3296, 2933, 2861, 2206, 1707, 1661; <sup>1</sup>H NMR (CDCl<sub>3</sub>, 400 MHz):  $\delta_{\text{H}}$  7.47 (1H, d,  $J$  = 8.4 Hz, H-6'), 6.84 (1H, d,  $J$  = 1.8 Hz, H-3'), 6.69-6.69 – 6.66 (1H, dd,  $J$  = 8.3, 1.8 Hz, H-5'), 4.57 (1H, d,  $J$  = 7.7 Hz, NH), 4.40 (1H, bs, NH), 3.48 (1H, bs, H-8'), 3.43 – 3.34 (1H, m, H-11'), 2.80 (2H, s, H-7), 2.54 (3H, s, H-11), 2.40 (2H, s, H-5), 2.18 – 2.11 (4H, m, H-10', H-12'), 1.45 (9H, s, H-16'), 1.40-1.23 (4H, m, H-9', H-13'), 1.11 (6H, s, H-10); <sup>13</sup>C NMR (CDCl<sub>3</sub>, 100 MHz):  $\delta_{\text{C}}$  193.4 (CO, C-4), 155.3 (CO, C-14'), 150.6 (q<sub>C</sub>, C-3), 150.3 (q<sub>C</sub>, C-4'), 149.2 (q<sub>C</sub>, C-9), 143.7 (q<sub>C</sub>, C-2'), 134.1 (CH, C-6'), 117.8 (q<sub>C</sub>, C-8), 117.3 (CN, C-7'), 110.7 (CH, C-5'), 105.8 (CH, C-3'), 95.1 (q<sub>C</sub>, C-1'), 79.7 (q<sub>C</sub>, C-15'), 52.5 (CH<sub>2</sub>, C-5), 51.3 (CH, C-11'), 49.2 (CH, C-8'), 37.9 (CH<sub>2</sub>, C-7), 36.0 (q<sub>C</sub>, C-6), 32.0 (2 x CH<sub>2</sub>, C-9', C-13'), 31.7 (2 x CH<sub>2</sub>, C-10', C-12'), 28.6 (5 x CH<sub>3</sub>, C-10, C-16'), 13.5 (CH<sub>3</sub>, C-11) ppm.

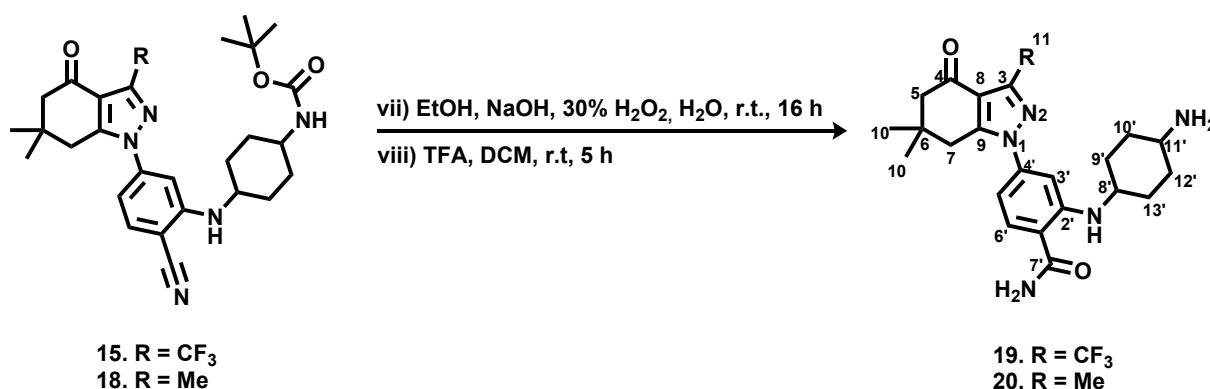

**General procedure for the nitrile hydrolysis of 15 and 18:** The nitrile (1.0 eq.) and K<sub>2</sub>CO<sub>3</sub> (2.2 eq.) were suspended in DMSO. The reaction mixture was then treated with 30% H<sub>2</sub>O<sub>2</sub> and stirred at room temperature. After 2 – 3 hours the crude reaction mixture was poured into ice-water and filtered; the precipitate was recrystallized from ethyl acetate to obtain the desired products.

**Amide analogue of 15** was synthesised following the general procedure using **15** (506 mg, 0.927 mmol, 1.00 eq.), K<sub>2</sub>CO<sub>3</sub> (282 mg, 2.04 mmol, 2.20 eq.) and 30% H<sub>2</sub>O<sub>2</sub> (150  $\mu$ L) in DMSO (3 mL) to obtain the amide as a white solid.

**tert-Butyl(4-((2-carbamoyl-5-(6,6-dimethyl-4-oxo-3-(trifluoromethyl)-4,5,6,7-tetrahydro-1H-indazol-1-yl)phenyl)amino)cyclohexyl)carbamate:** White solid (381 mg, 73% yield); IR ( $\nu_{\max}$  cm<sup>-1</sup>) 3336, 2933, 1677, 1586, 1511, 1451; <sup>13</sup>C NMR (DMSO, 125 MHz):  $\delta_{\text{C}}$  190.1 (CO, C-4), 170.7 (CO, C-7'), 154.8 (q<sub>C</sub>, C-14'), 151.9 (q<sub>C</sub>, C-9), 149.5 (q<sub>C</sub>, C-4'), 140.6 (q<sub>C</sub>, C-2'), 130.6 (CH, C-6'), 120.6 (CF<sub>3</sub>, q,  $J$  = 274.8 Hz, C-11), 115.3 (q<sub>C</sub>, C-8), 114.0 (q<sub>C</sub>, C-1'), 108.9 (CH, C-5'), 106.9 (CH, C-3'), 51.7 (CH<sub>2</sub>, C-5), 49.6 (CH, C-8'), 40.4 (CH, C-11'), 36.0 (CH<sub>2</sub>, C-7), 35.1 (q<sub>C</sub>, C-6), 31.3 (2 x CH<sub>2</sub>, C-10', C-12'), 31.1 (2 x CH<sub>2</sub>, C-9', C-13'), 28.2 (3 x CH<sub>3</sub>, C-16'), 27.5 (2 x CH<sub>3</sub>, C-10) ppm.

**Amide analogue of 18** was synthesised following the general procedure using **18** (80.0 mg, 0.163 mmol, 1.00 eq.), K<sub>2</sub>CO<sub>3</sub> (49.0 mg, 0.358 mmol, 2.20 eq.) and 30% H<sub>2</sub>O<sub>2</sub> (25.0  $\mu$ L) in DMSO (0.5 mL) to obtain the product as a white fluffy solid.

**tert-Butyl(4-((2-carbamoyl-5-(3,6,6-trimethyl-4-oxo-4,5,6,7-tetrahydro-1H-indazol-1-yl)phenyl)amino)cyclohexyl)carbamate:** White fluffy solid (50 mg, 60% yield); IR ( $\nu_{\max}$  cm<sup>-1</sup>) 3358, 3174, 2922,

1698, 1675, 1649, 1626; <sup>1</sup>H NMR (CDCl<sub>3</sub>, 500 MHz): δ<sub>H</sub> 8.05 (1H, d, *J* = 7.5 Hz, NH), 7.46 (1H, d, *J* = 8.4 Hz, H-6'), 6.76 (1H, d, *J* = 1.9 Hz, H-3'), 6.60-6.58 (1H, dd, *J* = 8.4, 2.0 Hz, H-5'), 5.77 (2H, bs, NH<sub>2</sub>), 4.42 (1H, s, NH), 3.48 (1H, s, H-8'), 3.34-3.26 (1H, m, H-11'), 2.80 (2H, s, H-7), 2.54 (3H, s, H-11), 2.39 (2H, s, H-5), 2.15-2.03 (4H, m, H-10', H-12'), 1.44 (9H, s, H-16'), 1.41-1.21 (4H, m, H-9', H-13'), 1.10 (6H, s, H-10); <sup>13</sup>C NMR (CDCl<sub>3</sub>, 125 MHz): δ<sub>C</sub> 193.5 (CO, C-4), 171.1 (CO, C-7'), 155.4 (CO, C-14'), 151.2 (q<sub>C</sub>, C-3), 150.3 (q<sub>C</sub>, C-4'), 149.3 (q<sub>C</sub>, C-9), 142.9 (q<sub>C</sub>, C-2'), 129.9 (CH, C-6'), 117.5 (q<sub>C</sub>, C-8), 113.8 (q<sub>C</sub>, C-1'), 110.5 (CH, C-5'), 108.2 (CH, C-3'), 79.5 (q<sub>C</sub>, C-15'), 52.5 (CH<sub>2</sub>, C-5), 52.0 (CH, C-11'), 49.2 (CH, C-8'), 37.9 (CH<sub>2</sub>, C-7), 36.0 (q<sub>C</sub>, C-6), 31.9 (2 x CH<sub>2</sub>, C-9', C-13'), 31.1 (2 x CH<sub>2</sub>, C-10', C-12'), 28.6 (5 x CH<sub>3</sub>, C-10, C-16'), 13.6 (CH<sub>3</sub>, C-11) ppm.

**General procedure for the removal of the Boc protecting group:** The Boc protected compounds were dissolved in a 4:1 DCM: TFA solution and stirred at room temperature. After 5 – 7 hours, the reaction mixture was concentrated in *vacuo* and the crude material was purified by silica gel chromatography (DCM: MeOH: NH<sub>3</sub>, 20:1:0.1-5:1:0.1) to afford the desired product either as a TFA salt or free amine.

**19** was synthesised following the general procedure using **15** (500 mg, 0.887 mmol, 1.0 eq.) in a 15.0 mL solution of DCM: TFA (4:1) to afford **19** as an off-white solid.

**2-((4-Aminocyclohexyl)amino)-4-(6,6-dimethyl-4-oxo-3-(trifluoromethyl)-4,5,6,7-tetrahydro-1H-indazol-1-yl)benzamide (19, isolated as a free amine):** Off-white solid (170 mg, 41% yield); IR (ν<sub>max</sub> cm<sup>-1</sup>) 3421, 2931, 2865, 1654, 1620, 1579, 1507; <sup>1</sup>H NMR (DMSO, 400 MHz): δ<sub>H</sub> 8.35 (1H, d, *J* = 7.6 Hz, NH), 7.96 (1H, bs, NH<sub>2</sub>), 7.78 (1H, d, *J* = 8.4 Hz, H-6'), 7.30 (1H, bs, NH<sub>2</sub>), 6.87 (1H, d, *J* = 2.0 Hz, H-3'), 6.72-6.70 (1H, dd, *J* = 8.4, 2.1 Hz, H-5'), 3.31 (1H, bs, H-8'), 2.97 (2H, s, H-7), 2.66 (1H, bs, H-11'), 2.45 (2H, s, H-5), 2.05-1.97 (2H, m), 1.84-1.75 (2H, m), 1.21 (4H, quin., *J* = 11.5, 9.7 Hz), 1.04 (6H, s, H-10); <sup>13</sup>C NMR (DMSO, 100 MHz): δ<sub>C</sub> 190.1 (CO, C-4), 170.7 (CO, C-7'), 151.9 (q<sub>C</sub>, C-9), 149.5 (q<sub>C</sub>, C-4'), 140.6 (q<sub>C</sub>, C-2'), 138.3 (q<sub>C</sub>, q, *J* = 39.1 Hz, C-3), 130.6 (CH, C-6'), 120.6 (CF<sub>3</sub>, q, *J* = 270.1 Hz, C-11), 115.3 (q<sub>C</sub>, C-8), 113.9 (q<sub>C</sub>, C-1'), 108.8 (CH, C-5'), 106.8 (CH, C-3'), 51.7 (CH<sub>2</sub>, C-5), 49.8 (CH, C-8'), 49.5 (CH, C-11'), 36.0 (CH<sub>2</sub>, C-7), 35.1 (q<sub>C</sub>, C-6), 33.9 (2 x CH<sub>2</sub>, C-10', C-12'), 31.0 (2 x CH<sub>2</sub>, C-9', C-13'), 27.5 (2 x CH<sub>3</sub>, C-10) ppm.

**20** was synthesised following the general procedure using **18** (218 mg, 0.428 mmol, 1.0 eq.) in a 7.5 mL solution of DCM: TFA (4:1) to afford **20** as an off-white solid.

**2-((4-Aminocyclohexyl)amino)-4-(3,6,6-trimethyl-4-oxo-4,5,6,7-tetrahydro-1H-indazol-1-yl)benzamide (20, isolated as a free amine):** off-white solid (139 mg, 64% yield); IR (ν<sub>max</sub> cm<sup>-1</sup>) 3300, 2926, 2864, 1653, 1617; <sup>1</sup>H NMR (DMSO, 400 MHz): δ<sub>H</sub> 8.34 (1H, d, *J* = 7.7 Hz, NH), 7.88 (1H, bs, NH<sub>2</sub>), 7.73 (1H, d, *J* = 8.5 Hz, H-6'), 7.20 (1H, bs, NH<sub>2</sub>), 6.77 (1H, d, *J* = 1.8 Hz, H-3'), 6.68 – 6.66 (1H, dd, *J* = 8.4, 1.8 Hz, H-5'), 3.29 (1H, bs, H-8'), 2.93 (2H, s, H-7), 2.69 – 2.60 (1H, m, H-11'), 2.40 (3H, s, H-11), 2.33 (2H, s, H-5), 2.05 – 1.97 (2H, m, H-9', H-13'), 1.84 – 1.74 (2H, m, H-10'), 1.26 – 1.15 (4H, m, H-12', H-13'), 1.02 (6H, s, H-10); <sup>13</sup>C NMR (DMSO, 100 MHz): δ<sub>C</sub> 192.8 (CO, C-4), 170.9 (CO, C-7'), 149.5 (q<sub>C</sub>, C-9), 149.4 (q<sub>C</sub>, C-4'), 148.2 (q<sub>C</sub>, C-3), 141.6 (q<sub>C</sub>, C-2'), 130.5 (CH, C-6'), 116.3 (q<sub>C</sub>, C-8), 112.6 (q<sub>C</sub>, C-1'), 108.0 (CH, C-5'), 105.5 (CH, C-3'), 51.7 (CH<sub>2</sub>, C-5), 49.8 (CH, C-8'), 49.6 (CH, C-11'), 36.6 (CH<sub>2</sub>, C-7), 35.2 (q<sub>C</sub>, C-6), 34.1 (2 x CH<sub>2</sub>, C-9', C-13'), 31.1 (2 x CH<sub>2</sub>, C-10', C-12'), 27.7 (2 x CH<sub>3</sub>, C-10), 13.1 (CH<sub>3</sub>, C-11) ppm.

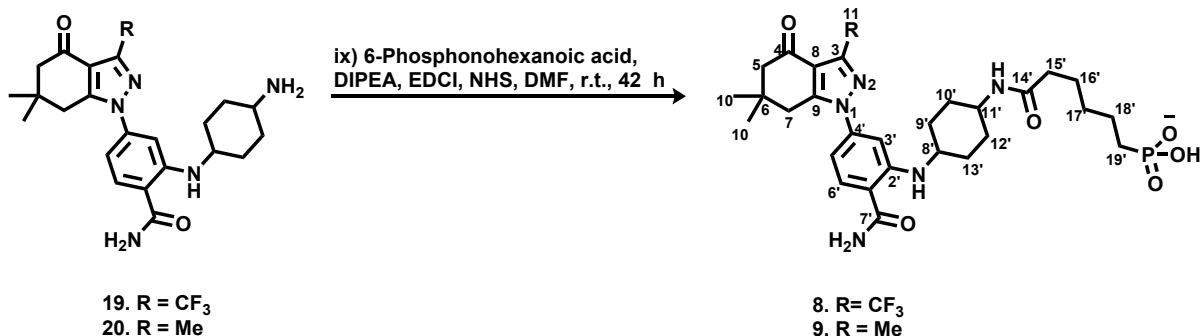

**General procedure for the amide coupling reaction to yield 8 and 9:** The amine was added to a round bottomed flask containing a solution of DIPEA in DMF, the resulting mixture was stirred at room temperature for 1 hour. Thereafter, a solution of carboxylic acid, EDCI and NHS in DMF was added to the reaction mixture and continued stirring at room temperature for 3 days. The solvent was removed in vacuo, and the crude material was directly loaded onto normal phase silica gel chromatography and purified using DCM:MeOH:NH<sub>3</sub> (5:1:0.1) as a mobile phase.

**8:** The general procedure was followed using **19** (55 mg, 1.0 eq., 0.12 mmol), DIPEA (0.28 mL, 13 eq., 1.5 mmol) in DMF (0.50 mL); and carboxylic acid (35 mg, 1.5 eq., 0.18 mmol), EDCI (34 mg, 1.5 eq., 0.18 mmol), NHS (16 mg, 1.2 eq., 0.14 mmol) in DMF (0.50 mL) to yield **8** as an off-white solid.

**(6-((4-((2-Carbamoyl-5-(6,6-dimethyl-4-oxo-3-(trifluoromethyl)-4,5,6,7-tetrahydro-1H-indazol-1-yl)phenyl)amino)cyclohexyl)amino)-6-oxohexyl)phosphonic acid (8):** Off-white solid (40 mg, 52% yield, 98% purity); IR ( $\nu_{\max}$  cm<sup>-1</sup>) 3232, 3125, 2936, 2873, 1665, 1576, 1509, 1482; <sup>1</sup>H NMR (DMSO, 400 MHz):  $\delta_{\text{H}}$  8.36 (1H, d,  $J = 7.6$  Hz, NH), 7.96 (1H, s, NH), 7.78 (1H, d,  $J = 8.5$  Hz, H-6'), 7.72 (1H, d,  $J = 7.6$  Hz, NH), 7.30 (1H, bs, NH), 6.89 (1H, d,  $J = 1.7$  Hz, H-3'), 6.72-6.70 (1H, dd,  $J = 8.4, 1.7$  Hz, H-5'), 3.60 – 3.51 (m, H-11'), 3.38 – 3.28 (m, H-8'), 2.97 (2H, s, H-5), 2.44 (2H, s, H-7), 2.29 – 2.16 (1H, m), 2.05-1.97 (4H, m), 1.82 – 1.79 (2H, m), 1.52 – 1.19 (17H, m), 1.04 (6H, s, H-10); <sup>13</sup>C NMR (DMSO, 100 MHz):  $\delta_{\text{C}}$  190.2 (CO, C-4), 171.4 (CO, C-14'), 170.7 (CO, C-7'), 151.9 (q<sub>C</sub>, C-9), 149.5 (q<sub>C</sub>, C-4'), 140.6 (q<sub>C</sub>, C-2'), 138.3 (q<sub>C</sub>, q,  $J = 39.0$  Hz, C-3), 130.7 (CH, C-6'), 120.6 (q<sub>C</sub>, q,  $J = 270.5$  Hz, C-11), 115.3 (q<sub>C</sub>, C-8), 113.9 (q<sub>C</sub>, C-1'), 108.9 (CH, C-5'), 106.8 (CH, C-3'), 51.7 (CH<sub>2</sub>, C-5), 49.6 (CH, C-8'), 47.0 (CH, C-11'), 36.0 (CH<sub>2</sub>, C-7), 35.4 (CH<sub>2</sub>, C-15'), 35.1 (q<sub>C</sub>, C-6), 31.1 (2 x CH<sub>2</sub>), 30.7 (2 x CH<sub>2</sub>), 29.5 (? X CH<sub>2</sub>), 28.1 (CH<sub>2</sub>), 27.5 (2 x CH<sub>3</sub>, C-10), 25.2 (CH<sub>2</sub>), 23.3 (2 x CH<sub>2</sub>) ppm. ESI-MS  $m/z$  642.2668 (calculated for [M+H]<sup>+</sup> C<sub>29</sub>H<sub>40</sub>N<sub>5</sub>O<sub>6</sub>PF<sub>3</sub> 642.2668).

**9:** The general procedure was followed using **20** (68 mg, 1.0 eq., 0.17 mmol), DIPEA (0.38 mL, 13 eq., 2.2 mmol) in DMF (0.60 mL); and carboxylic acid (49 mg, 1.5 eq., 0.25 mmol), EDCI (48 mg, 1.5 eq., 0.25 mmol), NHS (23 mg, 1.2 eq., 0.20 mmol) in DMF (0.60 mL) to yield **9** as an off-white solid.

**(6-((4-((2-Carbamoyl-5-(3,6,6-trimethyl-4-oxo-4,5,6,7-tetrahydro-1H-indazol-1-yl)phenyl)amino)cyclohexyl)amino)-6-oxohexyl)phosphonic acid (9):** Off-white solid (38 mg, 39% yield 97% purity); <sup>1</sup>H NMR (DMSO, 500 MHz):  $\delta_{\text{H}}$  8.34 (1H, d,  $J = 7.9$  Hz, NH), 7.89 (1H, bs, NH), 7.75 – 7.71 (2H, m, H-6'), 7.21 (1H, bs), 6.79 (1H, d,  $J = 1.9$  Hz, H-3'), 6.68 – 6.66 (1H, dd,  $J = 8.5, 1.9$  Hz, H-5'), 6.63 (1H, bs), 3.60 – 3.50 (2 x CH, m, H-11'), \*3.37 – 3.28 (1H, m, H-8'), 2.93 (2H, m, H-7), 2.40 (3H, s, H-11), 2.33 (2H, s, H-5), 2.06 – 1.99 (6H, m), 1.85 – 1.78 (2H, m), 1.53 – 1.18 (24H, m), 1.01 (6H, s, H-10); <sup>13</sup>C NMR (DMSO, 125 MHz):  $\delta_{\text{C}}$  192.8 (CO, C-4), 171.4 (CO, C-14'), 170.9 (CO, C-7'), 149.49 (q<sub>C</sub>), 149.47 (q<sub>C</sub>), 148.2 (q<sub>C</sub>, C-3), 141.6 (q<sub>C</sub>, C-2'), 130.5 (CH, C-6'), 116.4 (q<sub>C</sub>, C-8), 112.7 (q<sub>C</sub>, C-1'), 108.1 (CH, C-5'), 105.6 (CH, C-3'), 51.7 (CH<sub>2</sub>, C-5), 49.6 (CH, C-8'), 47.1 (CH, C-11'), 36.7 (CH<sub>2</sub>, C-7), 35.4 (q<sub>C</sub>, C-6), 35.2 (2 x CH<sub>2</sub>), 34.2 (2 x CH<sub>2</sub>), 31.1 (2 x CH<sub>2</sub>), 30.7 (2 x CH<sub>2</sub>), 27.7 (2 x CH<sub>3</sub>, C-10), 25.3 (CH<sub>2</sub>), 23.4 (CH<sub>2</sub>), 13.1 (CH<sub>3</sub>, C-11) ppm. ESI-MS  $m/z$  588.2947 (calculated for [M+H]<sup>+</sup> C<sub>29</sub>H<sub>43</sub>N<sub>5</sub>O<sub>6</sub>P 588.2951). \*resolved by HSQC

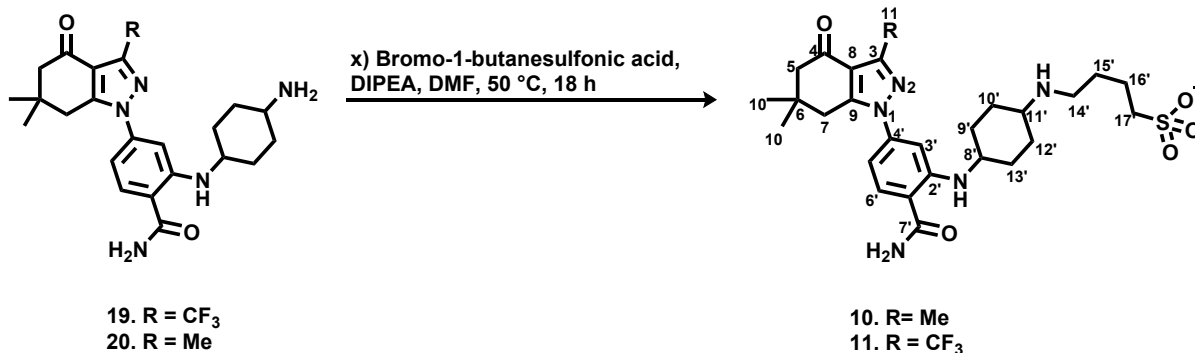

**General procedure for bromine displacement to yield 10 and 11:** The reactants were suspended in DMF and stirred 50 °C. After 18 hours the reaction mixture was concentrated *in vacuo* and purified using silica gel chromatography using DCM:MeOH:NH<sub>3</sub> (5:1:0.1) solvent mixture as the mobile phase.

**10** was synthesised following the general procedure using **20** (110 mg, 0.269 mmol, 1.00 eq.), 4-bromobutane-1-sulfonic acid (64.0 mg, 0.269 mmol, 1.00 eq.) and DIPEA (140 μL, 0.806 mmol, 3.00 eq.) in DMF (1.00 mL) to afford the desired product as a white fluffy solid.

**4-((4-((2-Carbamoyl-5-(3,6,6-trimethyl-4-oxo-4,5,6,7-tetrahydro-1H-indazol-1-yl)phenyl)amino)cyclohexyl)amino)butane-1-sulfonic acid (10):**

White fluffy solid (94 mg, 62% yield, 97% purity); IR ( $\nu_{\max}$  cm<sup>-1</sup>) 3358, 2938, 1651, 1621, 1581, 1551; <sup>1</sup>H NMR (DMSO, 500 MHz):  $\delta_{\text{H}}$  8.36 (1H, d,  $J = 7.7$  Hz, NH), 7.93 (1H, bs, NH), 7.75 (1H, d,  $J = 8.6$  Hz, H-6'), 7.71 – 7.44 (6H, m), 7.23 (1H, bs, NH), 6.83 (1H, d,  $J = 1.91$  Hz, H-3'), 6.69 – 6.67 (1H, dd,  $J = 8.4, 1.9$  Hz, H-5'), \*3.36 (bs, H-8'), 3.06 – 3.02 (1H, m, H-11'), 2.92 – 2.89 (4H, m, H-7), \*2.50 – 2.46 (2H, m), 2.40 (3H, s, H-11), 2.33 (2H, s, H-5), 2.11 (4H, d,  $J = 10.6$  Hz), 1.76 – 1.62 (4H, m), 1.59 – 1.45 (2H, m), 1.28 – 1.21 (2H, m), 1.02 (6H, s, H-10); <sup>13</sup>C NMR (DMSO, 125 MHz):  $\delta_{\text{C}}$  192.8 (CO, C-4), 170.9 (CO, C-7'), 149.5 (q<sub>C</sub>), 149.4 (q<sub>C</sub>), 148.2 (q<sub>C</sub>, C-3), 141.6 (q<sub>C</sub>, C-2'), 130.5 (CH, C-6'), 116.3 (q<sub>C</sub>, C-8), 112.8 (q<sub>C</sub>, C-1'), 108.4 (CH, C-5'), 105.7 (CH, C-3'), 55.2 (CH, C-11'), 51.8 (CH<sub>2</sub>, C-5), 50.6 (CH<sub>2</sub>), 49.2 (CH, C-8'), 44.0 (CH<sub>2</sub>), 36.6 (CH<sub>2</sub>, C-7), 35.3 (q<sub>C</sub>, C-6), 30.3 (2 x CH<sub>2</sub>), 27.8 (2 x CH<sub>3</sub>, C-10), 27.1 (2 x CH<sub>2</sub>), 25.0 (CH<sub>2</sub>), 22.4 (CH<sub>2</sub>), 13.1 (CH<sub>3</sub>, C-11) ppm. ESI-MS  $m/z$  546.2756 (calculated for [M+H]<sup>+</sup> C<sub>27</sub>H<sub>40</sub>N<sub>5</sub>O<sub>5</sub>S 546.2750). \*resolved by HSQC

**11** was synthesised following the general procedure using **19** (100 mg, 0.216 mmol, 1.00 eq.), 4-bromo-1-butan-1-sulfonic acid (52.0 mg, 0.216 mmol, 1.00 eq.), DIPEA (120 μL, 0.647 mmol, 3.00 eq.) in DMF (1.00 mL) to afford the desired product as a white powder.

**4-((4-((2-carbamoyl-5-(6,6-dimethyl-4-oxo-3-(trifluoromethyl)-4,5,6,7-tetrahydro-1H-indazol-1-yl)phenyl)amino)cyclohexyl)amino)butane-1-sulfonic acid (11):**

White powder (71 mg, 53% yield, 95% purity); IR ( $\nu_{\max}$  cm<sup>-1</sup>) 3410, 3349, 3215, 2950, 2857, 1660, 1627, 1579, 1509; <sup>1</sup>H NMR (DMSO, 400 MHz):  $\delta_{\text{H}}$  8.37 (1H, d,  $J = 7.7$  Hz, NH), 7.99 (1H, bs, NH), 7.79 (1H, d,  $J = 8.5$  Hz, H-6'), 7.76 – 7.41 (3H, m), 7.33 (1H, bs, NH), 6.93 (1H, d,  $J = 1.9$  Hz, H-3'), 6.74 – 6.71 (1H, dd,  $J = 8.4, 1.9$  Hz, H-5'), \*3.37 – 3.29 (H-8'), 3.10 – 2.98 (1H, m, H-11'), 2.97 (2H, s, H-7), 2.93 (2H, t,  $J = 7.0$  Hz, H-17'), \*2.50 – 2.38 (4H, m, H-5, H-14'), 2.18 – 2.03 (4H, m, H-9', H-10'), 1.76 – 1.62 (4H, m, H-15', H-16'), 1.56 – 1.41 (2H, m, H-12'), 1.32 – 1.18 (2H, m, H-13'), 1.04 (6H, s, H-10); <sup>13</sup>C NMR (DMSO, 100 MHz):  $\delta_{\text{C}}$  190.2 (CO, C-4), 170.7 (CO, C-7'), 152.0 (q<sub>C</sub>, C-9), 149.4 (q<sub>C</sub>, C-4'), 140.6 (q<sub>C</sub>, C-2'), 138.4 (q<sub>C</sub>, q,  $J = 39.0$  Hz, C-3), 130.7 (CH, C-6'), 120.6 (q<sub>C</sub>, q,  $J = 270.5$  Hz, C-11), 115.3 (q<sub>C</sub>, C-8), 114.1 (q<sub>C</sub>, C-1'), 109.2 (CH, C-5'), 107.0 (CH, C-3'), 55.3 (CH, C-11'), 51.7 (CH<sub>2</sub>, C-5), 50.5 (CH<sub>2</sub>, C-14'), 49.2 (CH, C-8'), 44.1 (CH<sub>2</sub>, C-17'), 36.0 (CH<sub>2</sub>, C-7), 35.1 (q<sub>C</sub>, C-6), 30.2 (2 x CH<sub>2</sub>), 27.5 (2 x CH<sub>3</sub>, C-10), 27.2 (2 x CH<sub>2</sub>), 25.0 (CH<sub>2</sub>), 22.3 (CH<sub>2</sub>) ppm. ESI-MS  $m/z$  600.2469 (calculated for [M+H]<sup>+</sup> C<sub>27</sub>H<sub>37</sub>N<sub>5</sub>O<sub>5</sub>SF<sub>3</sub> 600.2467). \*resolved by HSQC

## Biological assay

### Cytotoxicity assay

Cells were seeded at a dilution of  $1 \times 10^5$  cells/ml in triplicate in 96well plate in 50  $\mu$ l in DMEM supplemented with 10% [v/v] Foetal Bovine Serum (Capricorn) and 1% [v/v] Penicillin-Streptomycin-Amptotericin (Gibco). The next day, cells were treated with an range of concentrations for 72 hrs. Following this, resazurin solution (0.54 mM) was added to the cells, incubated at 37°C for 4 h and fluorescence (Ex 560 nm, Em 590 nm) was read. Graph Pad Prism software was used to determine the half-maximal inhibitory concentration ( $IC_{50}$ ) by non-linear regression.

### Recombinant protein production and purification

Purification of recombinant proteins (human Hsp90 $\alpha$ , wild type FUD and mutant FUD) was conducted as previously described.<sup>1</sup>

### ATPase activity assay

ATPase activity assay was performed using a Kinase-Glo® Luminescent kinase kit (Promega, V6072) according to the manufacturer's instructions with modifications. In this assay, the luciferase activity is proportional to the remaining ATP after hydrolysis in the presence of Hsp90. Therefore, inhibition of Hsp90 is indicated by an increase in luciferase activity relative to the DMSO control. Hsp90 $\alpha$  (18  $\mu$ M) was incubated with the compounds (20  $\mu$ M) or controls at 37 °C with rotation for at least 6 h in ATPase buffer (40 mM HEPES, 150 mM KCl, 5 mM MgCl<sub>2</sub>, 1mM ATP, pH 7.5.). Next, 100  $\mu$ M of ATP was added and the reactions incubated for another 6 h. The ATPase reaction was stopped by transferring the samples to ice. The reactions were mixed with a 50  $\mu$ L volume of reaction mixture in triplicate, transferred to a white opaque 96-well plate and mixed with 50  $\mu$ l of Kinase-Glo working solution. Luminescence endpoint readings were recorded after 10 min incubation at RT using the Promega Glomax plate reader at 25 °C with an integration time of 2 s. Data were normalized to reactions with DMSO (taken as 1). Controls lacking Hsp90 were conducted to confirm that the compounds did not inhibit luciferase activity.

### Western blot analysis

Cells were lysed in RIPA buffer (Sigma Aldrich) supplemented with Protease Inhibitory Cocktail (Roche). Equal amounts of protein were loaded and analyzed by using the modified standard Laemmli SDS-PAGE method.<sup>2</sup> The gel was transferred to nitrocellulose membrane and blocked in 1% (w/v) Blotto (Santa Cruz) in TBS for 1 h at room temperature. Primary antibodies (Table S1) for Cdk4 and Histone were incubated overnight whereas HSP/HSC70 was incubated for 1 h at room temperature. Species specific HRP conjugated secondary antibodies (Table S1) were incubated for 1 h at room temperature. The visualization of protein was done by addition of ECL substrate (Bio-Rad) and detection using the Bio-Rad Chemi-doc. The band intensity was quantified using Image J software, normalized to the control and statistical analysis was done using the software Graph Pad.

Table S1: Antibodies used for western blot analysis

| Type      | Name               | Supplier                 | Catalogue number | Dilution |
|-----------|--------------------|--------------------------|------------------|----------|
| Primary   | Cdk4               | Abcam                    | ab137675         | 1:1000   |
|           | HSP70/HSC70        | Santa Cruz Biotechnology | sc-24            | 1:10,000 |
|           | Histone H3         | Abcam                    | ab1791           | 1:2500   |
| Secondary | Donkey Anti-Rabbit | Abcam                    | ab97064          | 1:5000   |
|           | Goat Anti-Mouse    | Abcam                    | ab97023          | 1:5000   |



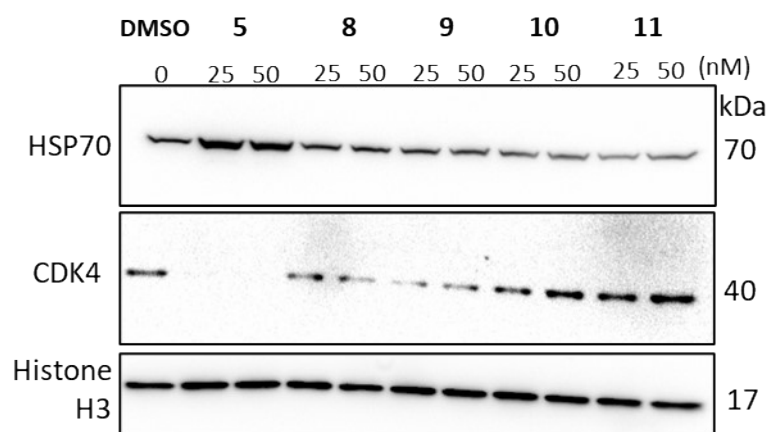

### Decellularization assay

Preparation of the decellularized extracellular matrix (ECM) from Hs578T breast carcinoma cells was adapted from previously published method.<sup>1</sup> Briefly, coverslips were incubated with 0.2% [w/v] sterile gelatin for 1 h at 37 °C before crosslinking with 1% [v/v] sterile glutaraldehyde in PBS for 30 min at room temperature. Coverslips were washed with PBS, quenched with 1 M sterile ethanolamine, and washed again with PBS. Hs578T cells were seeded onto the prepared coverslips in 12-well plates at high cell density. Upon confluency, the medium was replaced with 50 µg/ml ascorbic acid-containing medium, which was changed every second day thereafter. After 6 days of culture, cells were treated for 24 h with compounds (5 nM) or controls. The following day, the cells were incubated with 50 mM EDTA for 10 min at 37 °C before cell denuding with extraction buffer (20 mM NH<sub>4</sub>OH and 0.5% [v/v] Triton-X in PBS). Without removing the extraction buffer, PBS was added to each of the wells and placed at 4°C overnight to improve the stability of the newly extracted matrices. To remove DNA, wells were incubated with 10 µg/mL of DNase I (Roche, Basel, Switzerland) for 30 min at 37 °C. Fresh ECM were fixed with 3.7% [w/v] paraformaldehyde solution. Fixed cell matrices were blocked with 1% [w/v] BSA/PBS followed by overnight incubation with rabbit anti- human fibronectin (FN) primary antibody in 1% [w/v] BSA/TBS at 4 °C. The following day, samples were washed twice with 1% [w/v] BSA/TBS-T (TBS containing 0.1% [w/v] Tween-20) followed by 1 h incubation with species-specific fluorescently tagged secondary antibodies (donkey anti-mouse Alexa Fluor 555). Nuclei were stained with Hoechst 33342 dye (1 µg/ml in distilled water). Images were captured using the Olympus Fluorescence BX50 microscope and analysed using Image J.

- 1 A. Chakraborty, R. Tonui and A. L. Edkins, *Cell Stress Chaperones*, 2023, **28**, 697–707.
- 2 M. C. Hunter, K. L. O'Hagan, A. Kenyon, K. C. H. Dhanani, E. Prinsloo and A. L. Edkins, *PLoS One*, 2014, **9**, e86842.

<sup>1</sup>H and <sup>13</sup>C NMR spectra

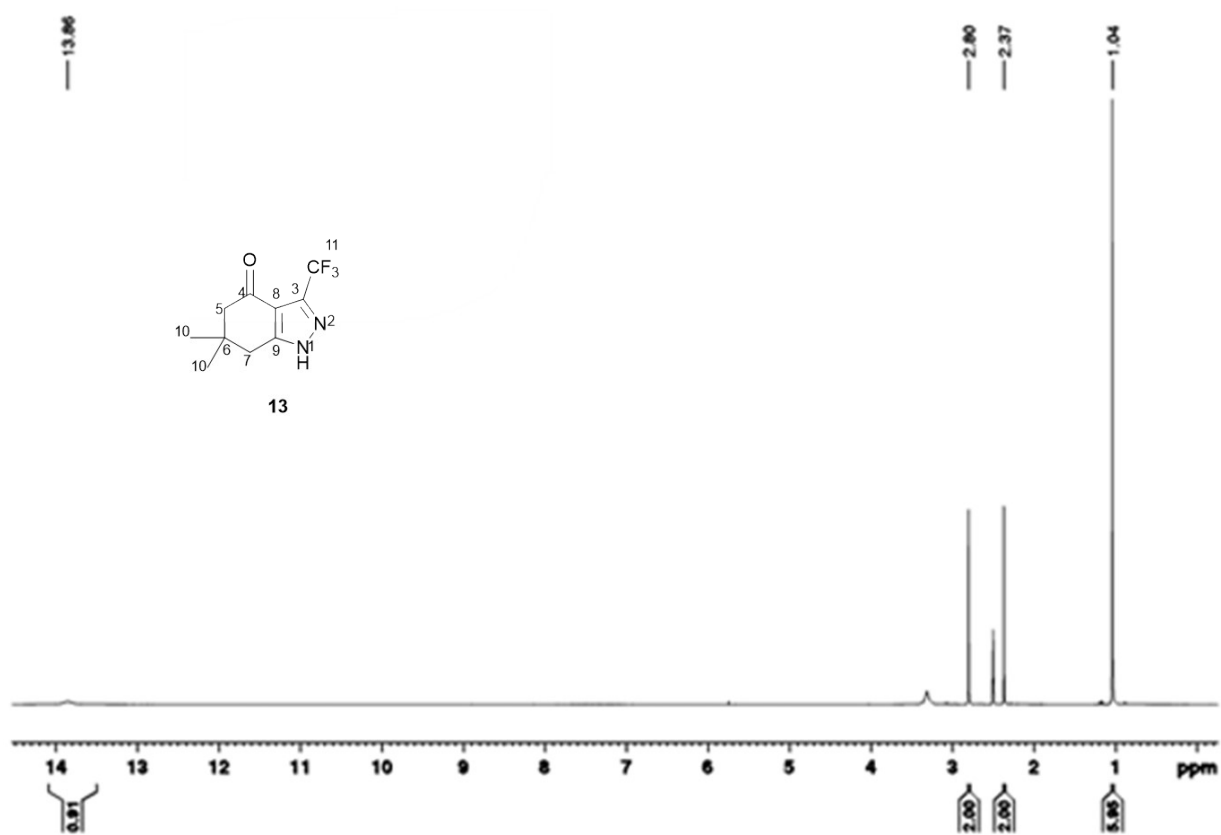

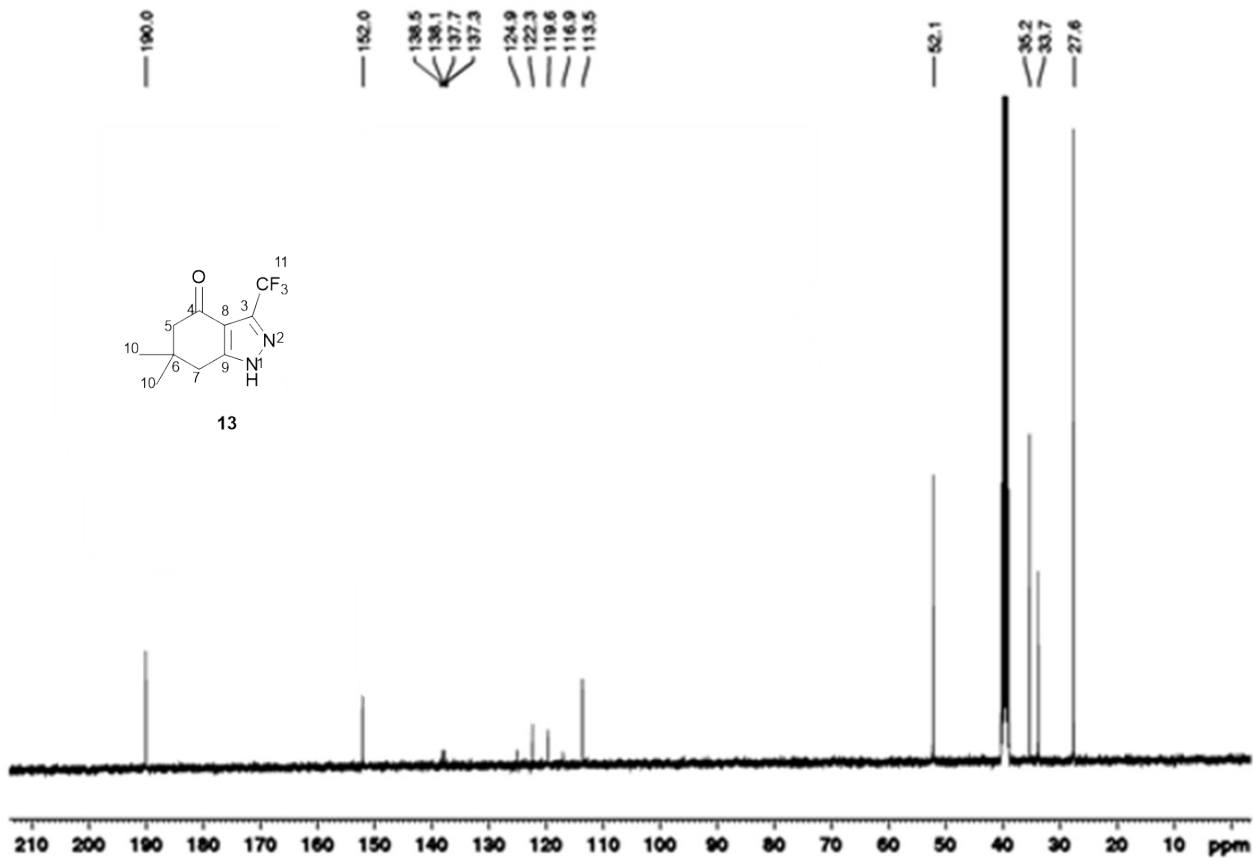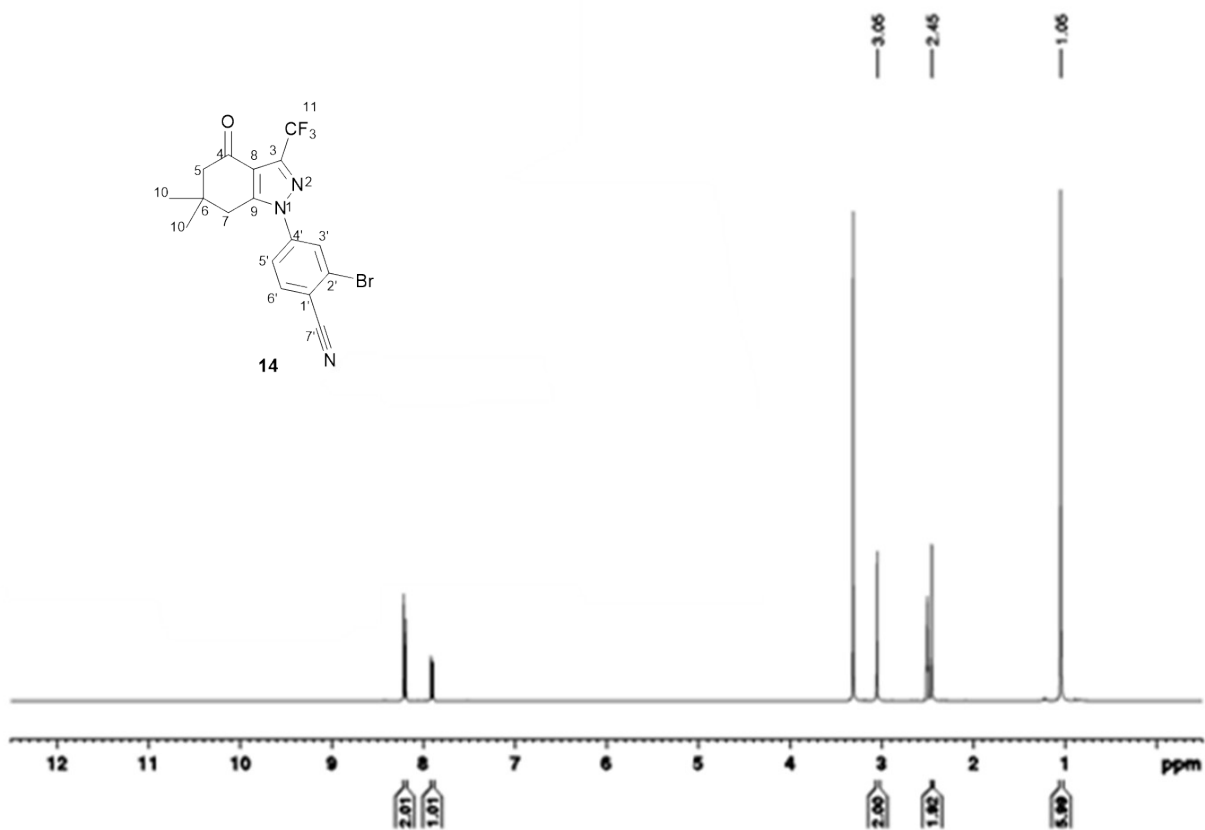

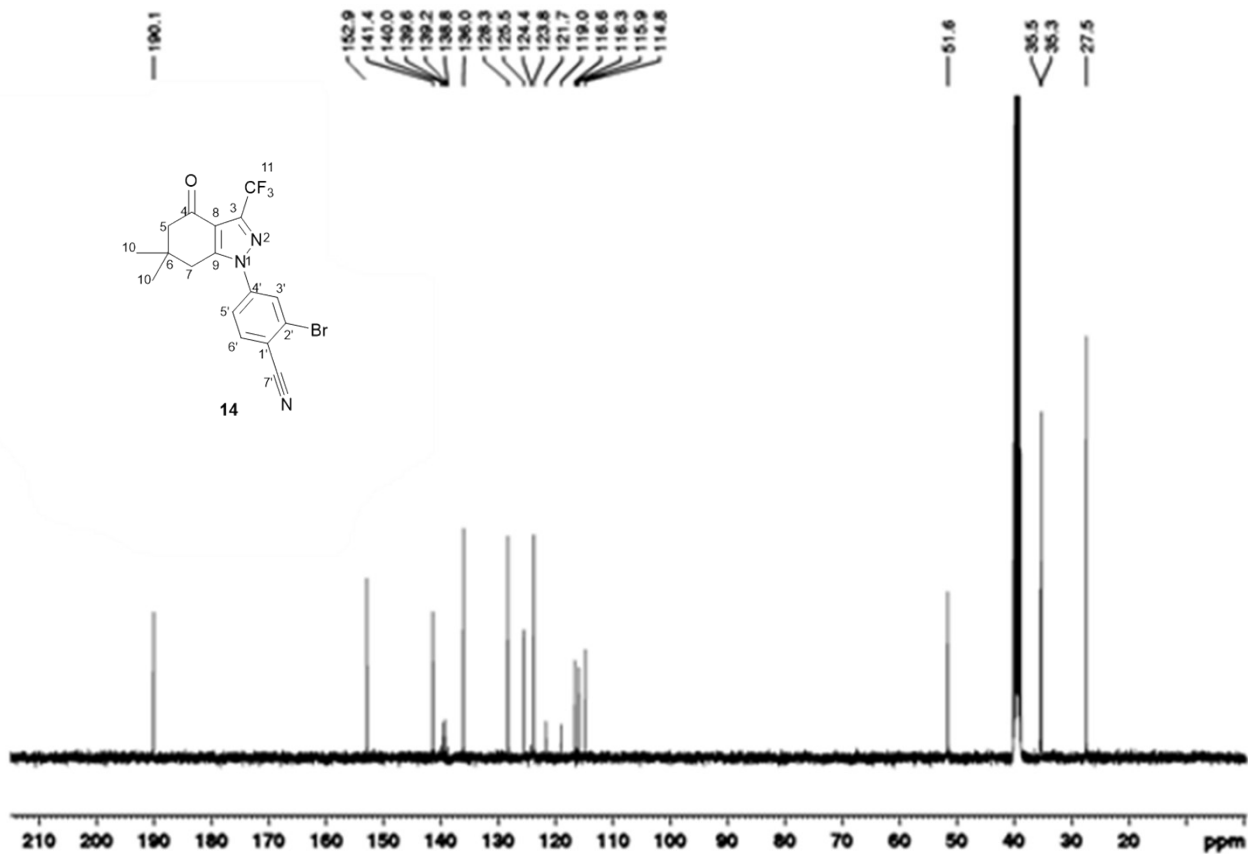

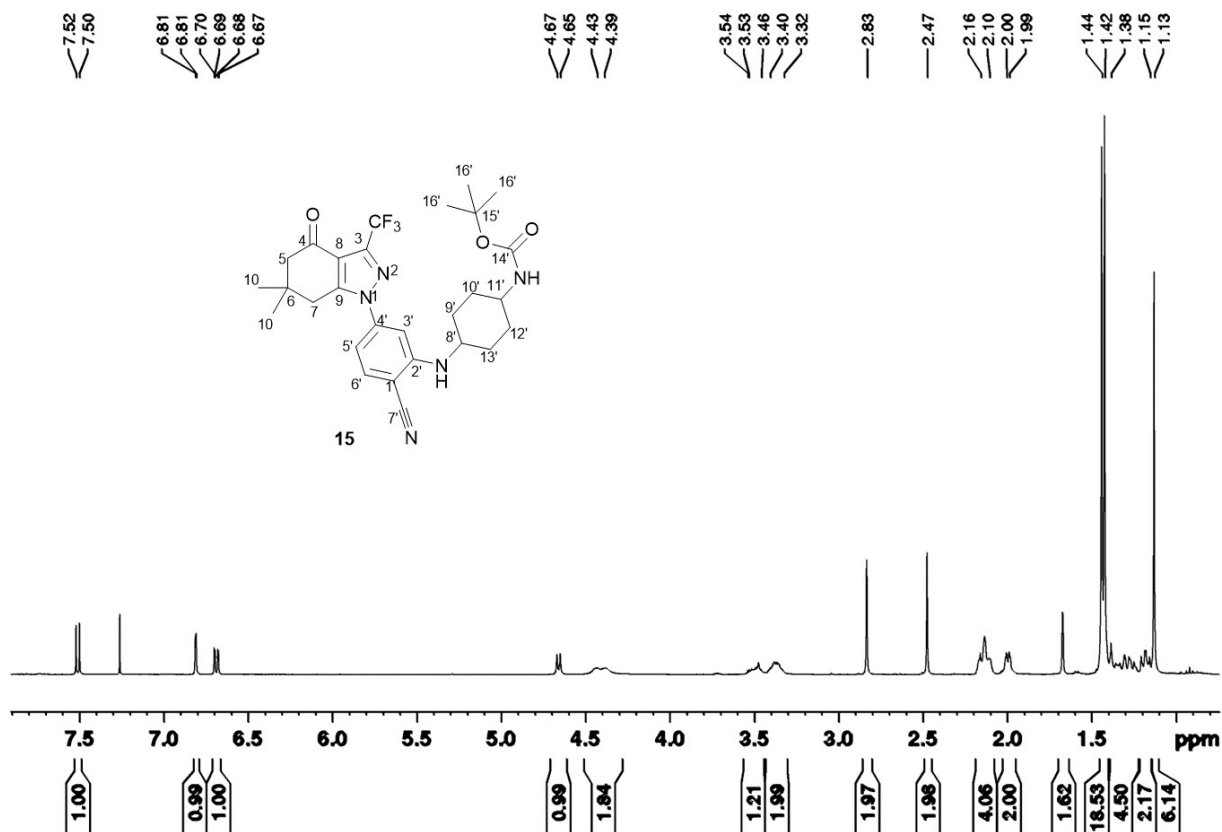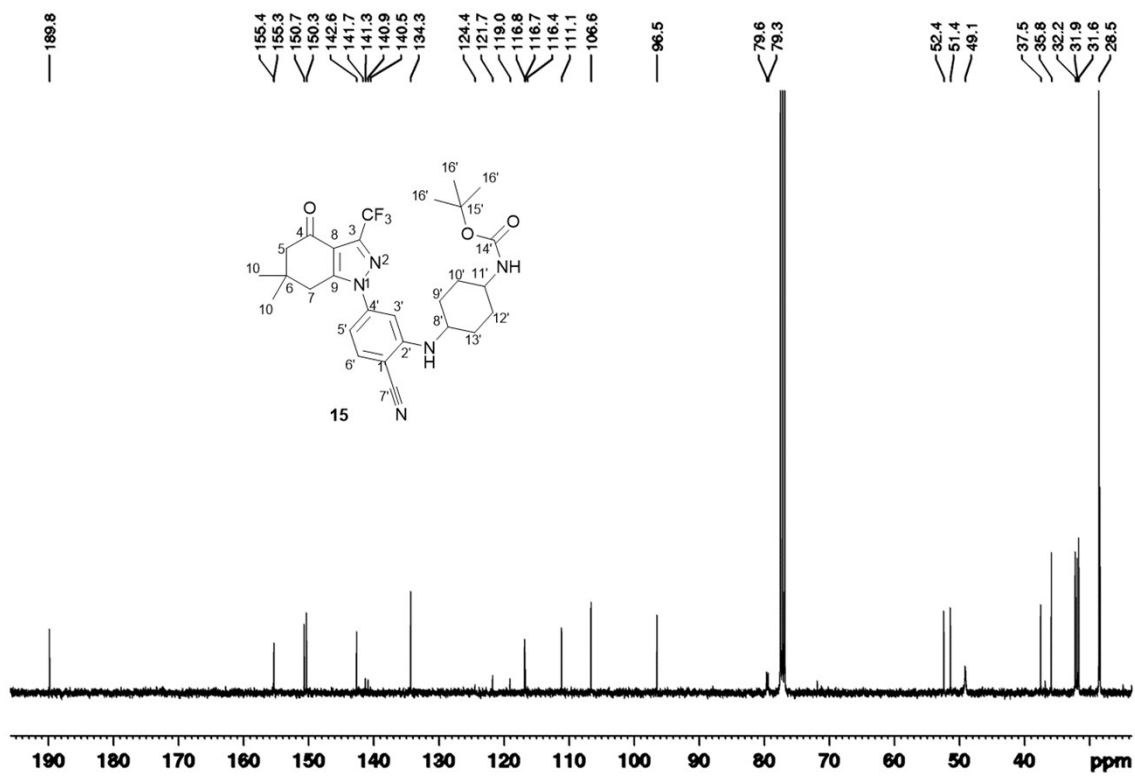

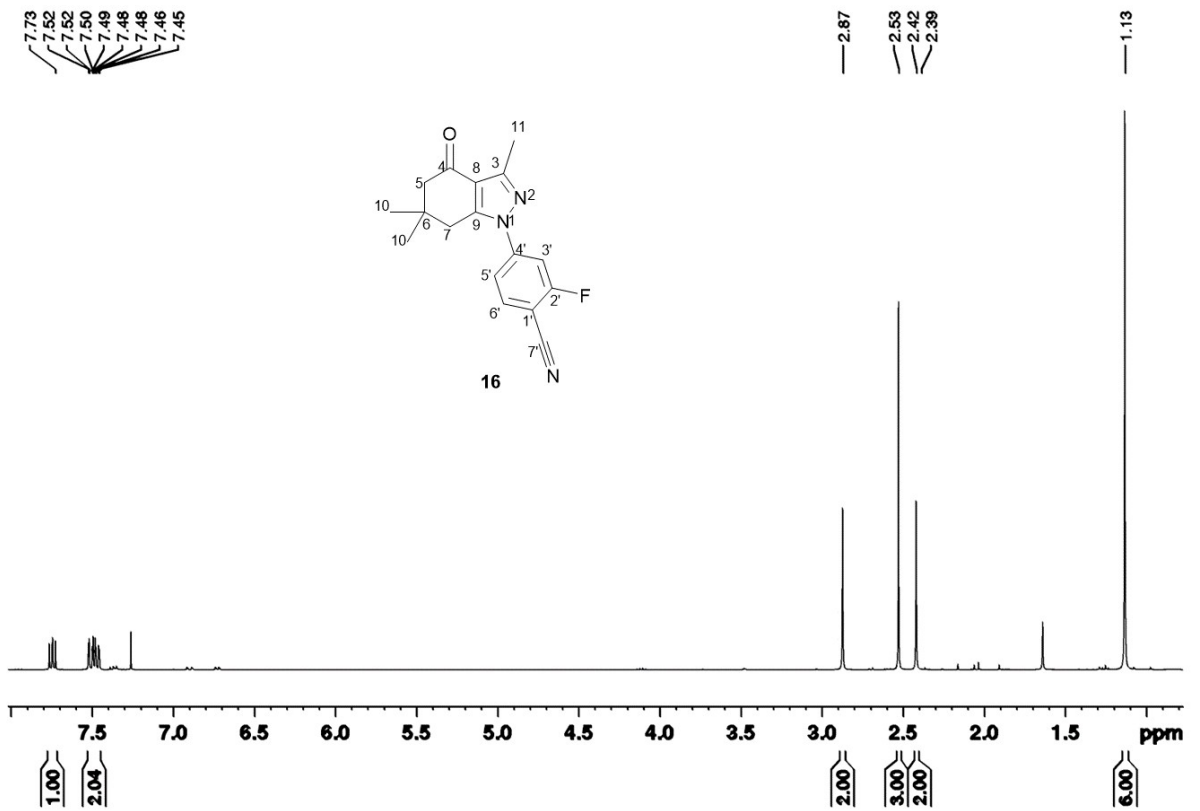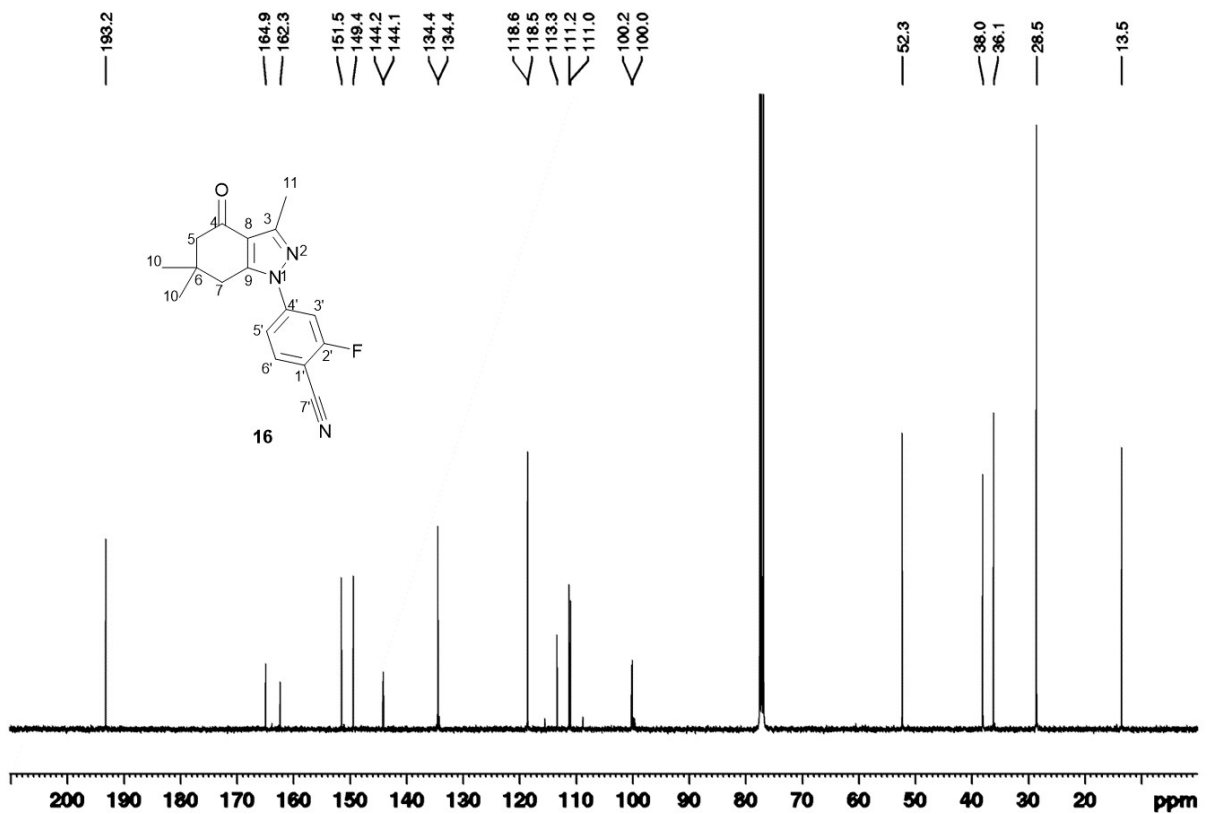



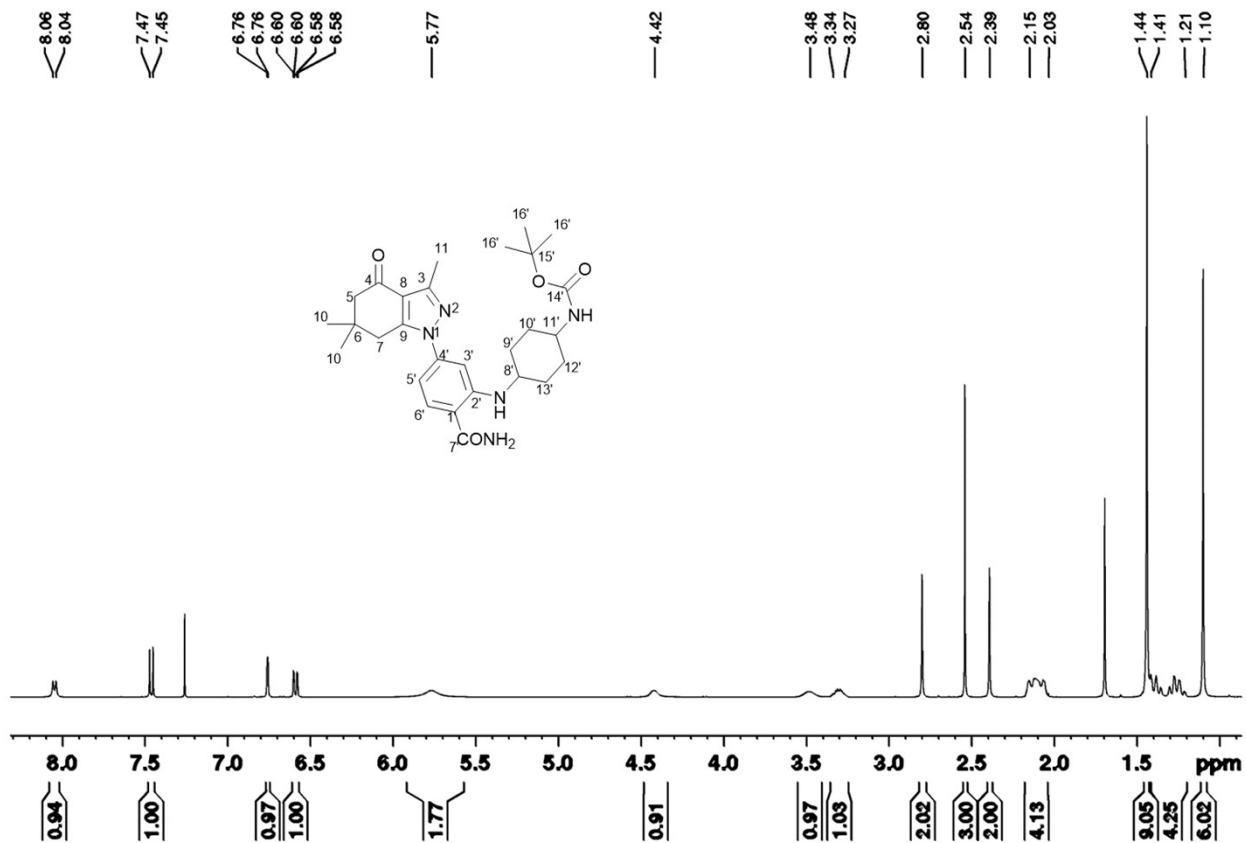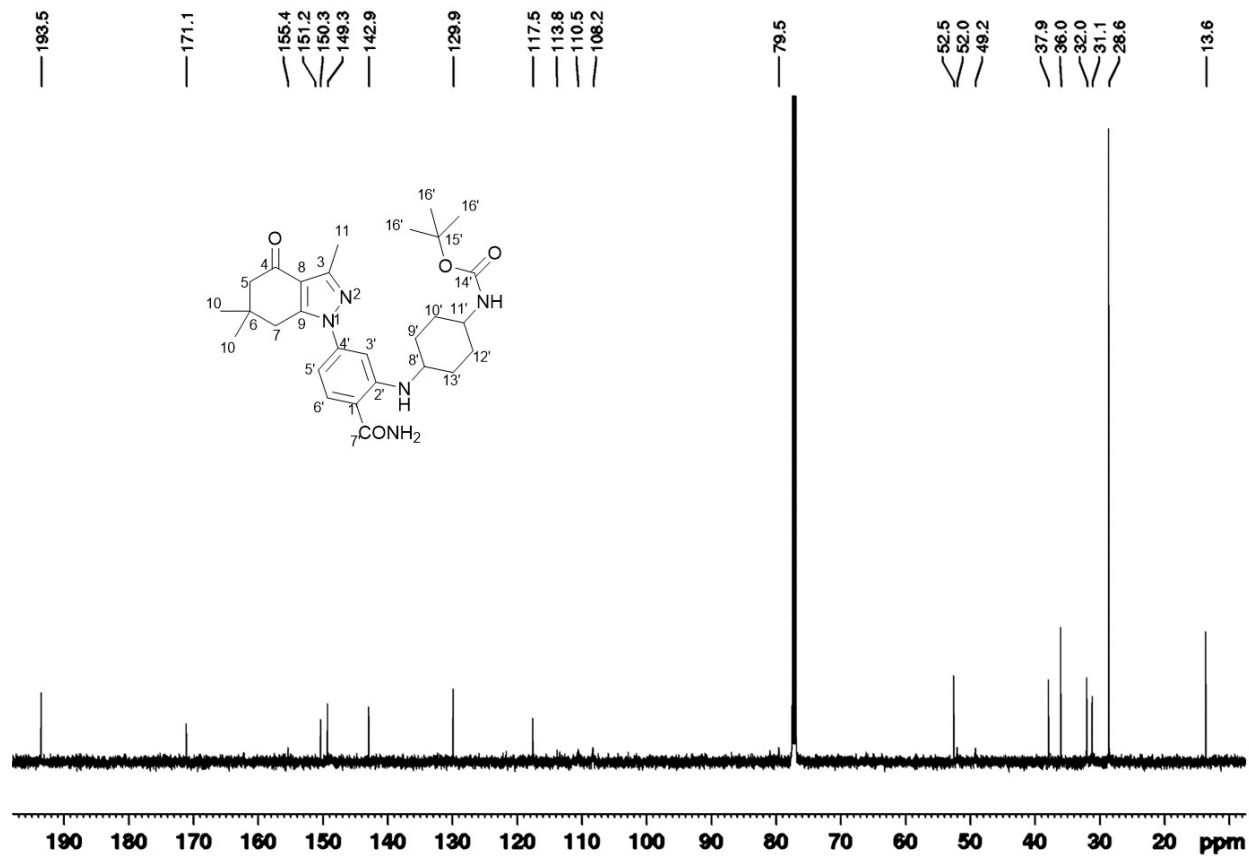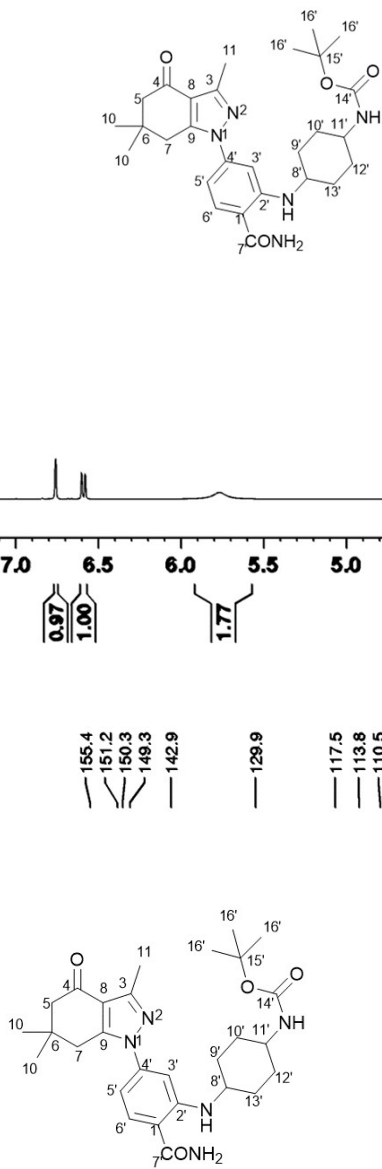



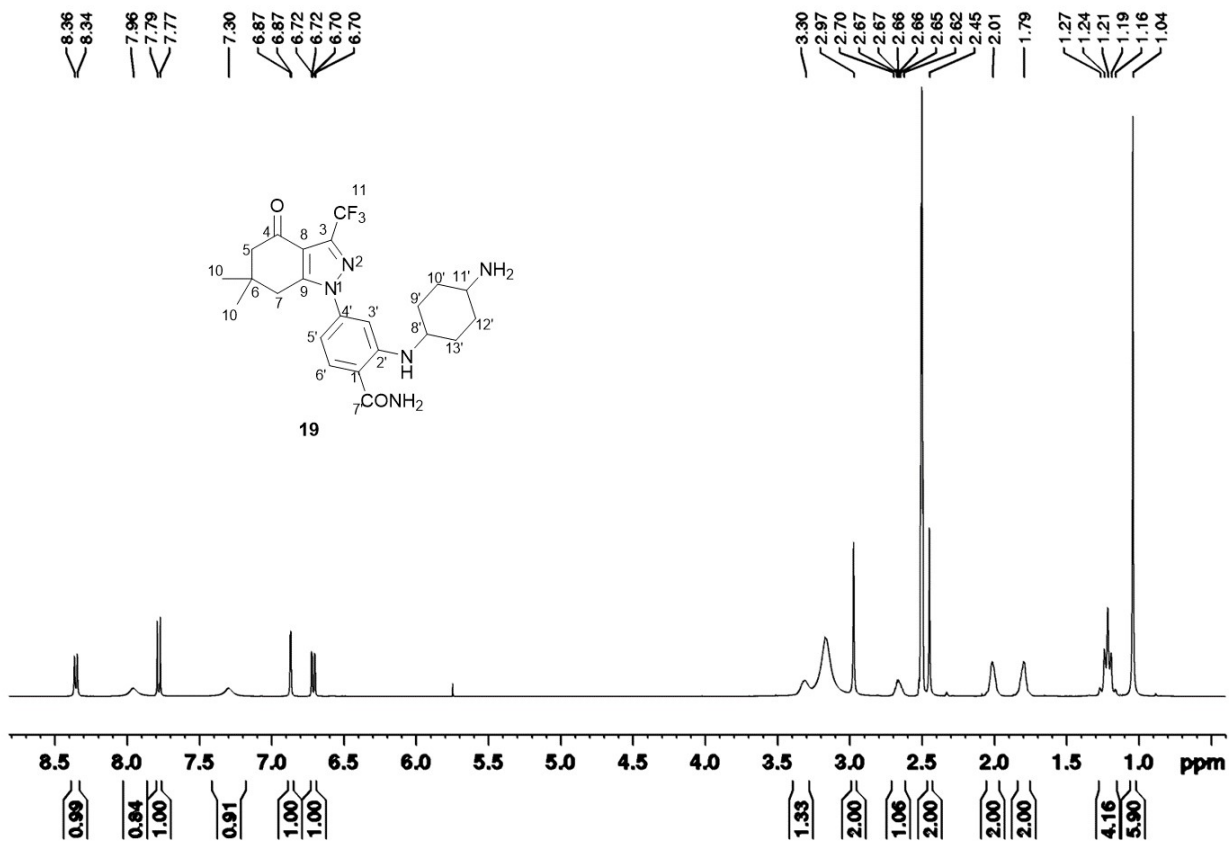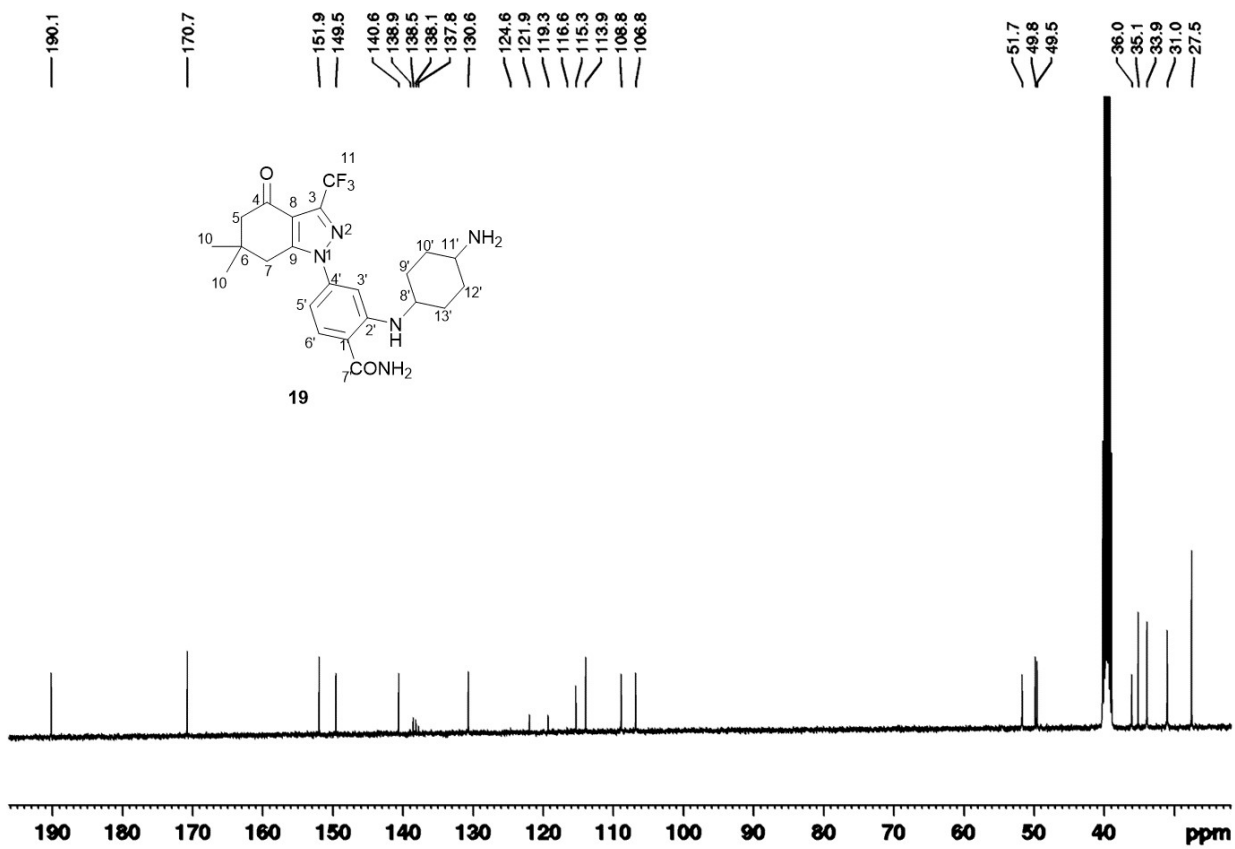



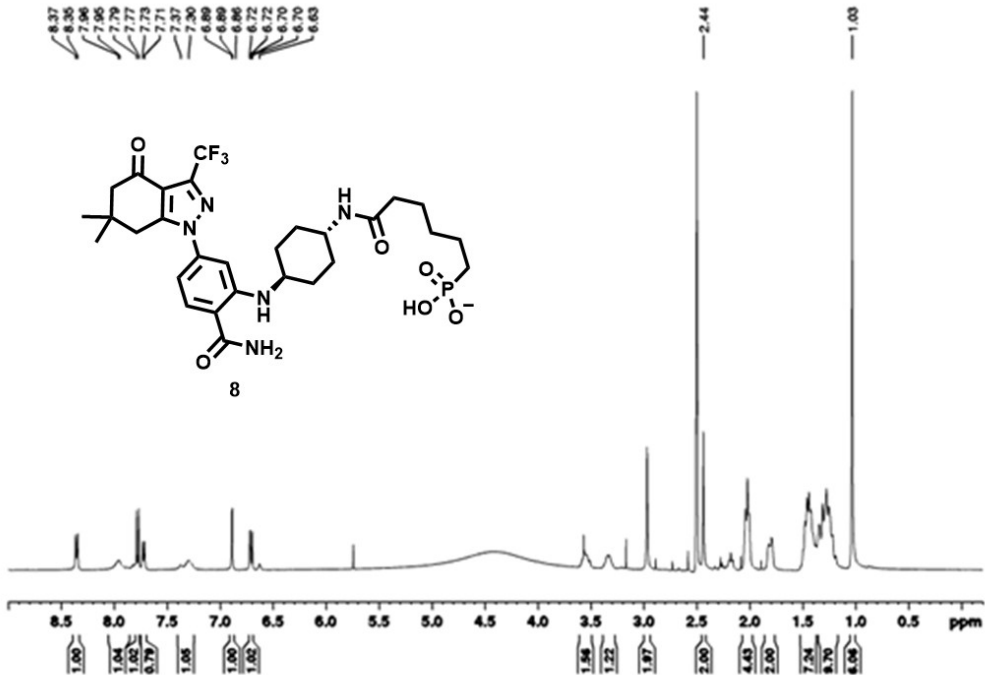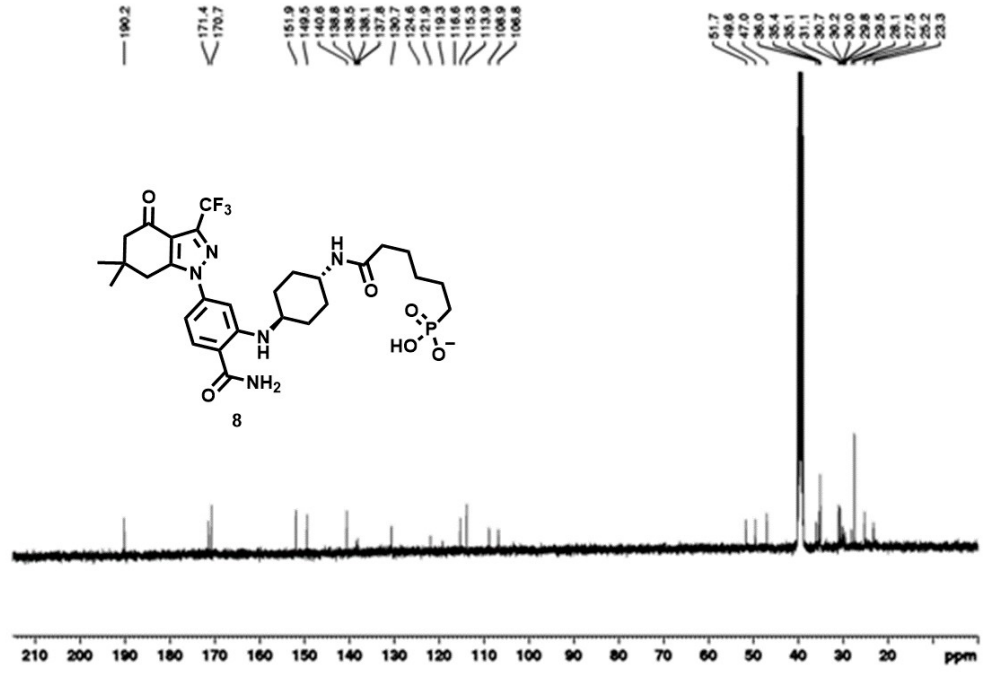

CV\_UCT\_220315\_1

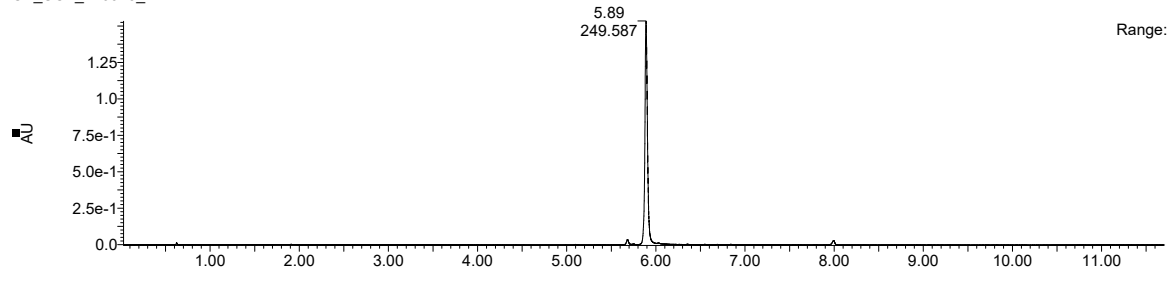

4: Diode Array  
280  
Range: 1.536

GSM 05-001  
CV\_UCT\_220315\_1 787 (6.030)

1: TOF MS ES+  
1.96e4

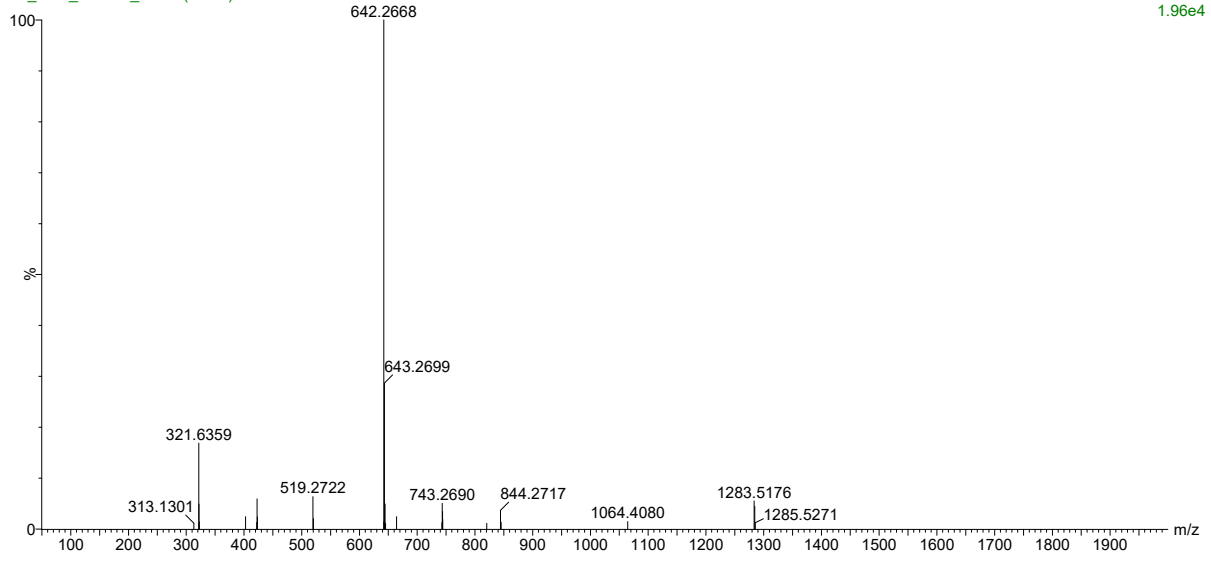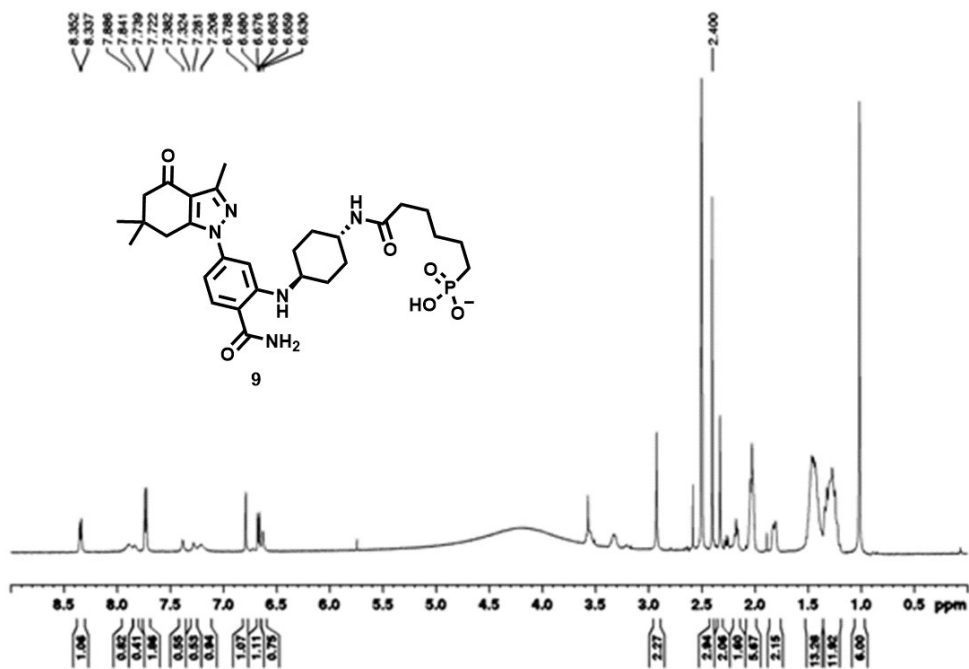

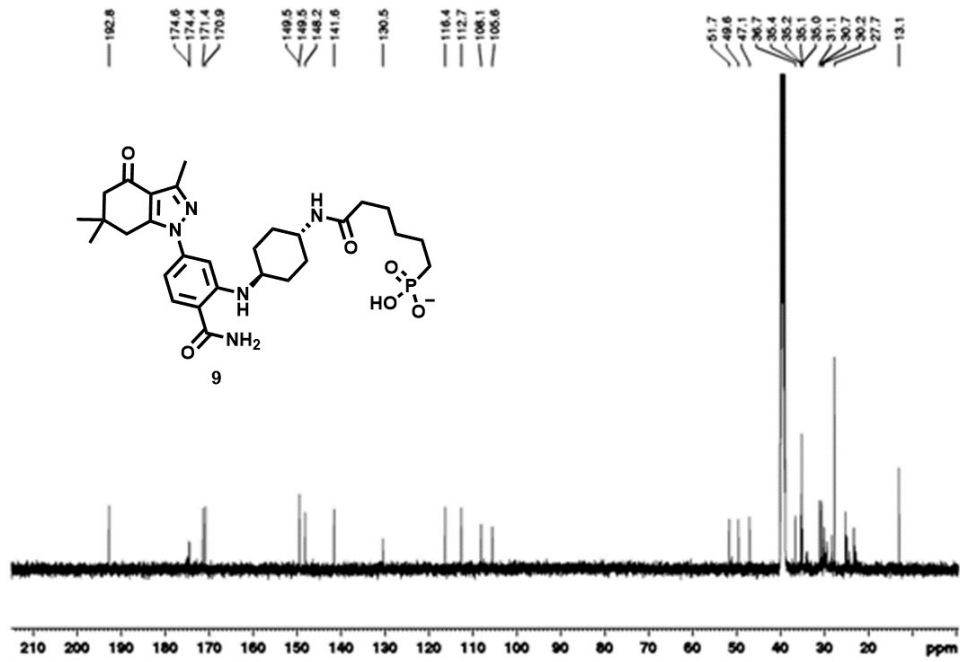

CV\_UCT\_220315\_3

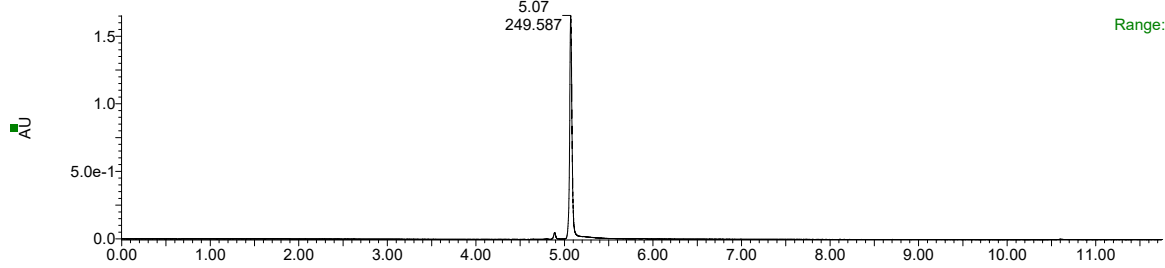

4: Diode Array  
360  
Range: 1.657

GSM 05-005

CV\_UCT\_220315\_3 670 (5.144)

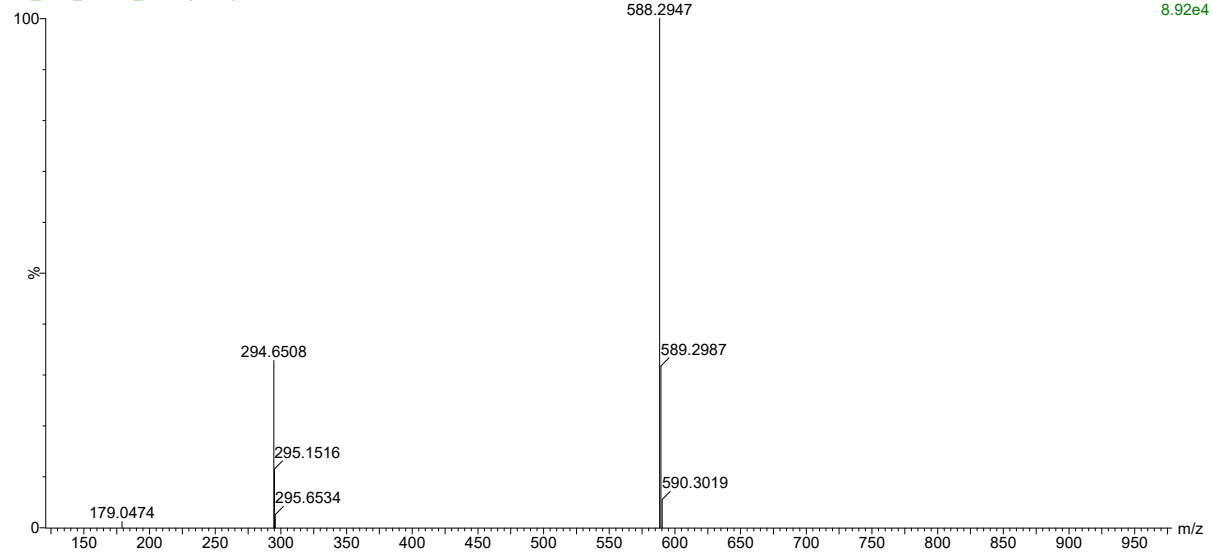

1: TOF MS ES+  
8.92e4

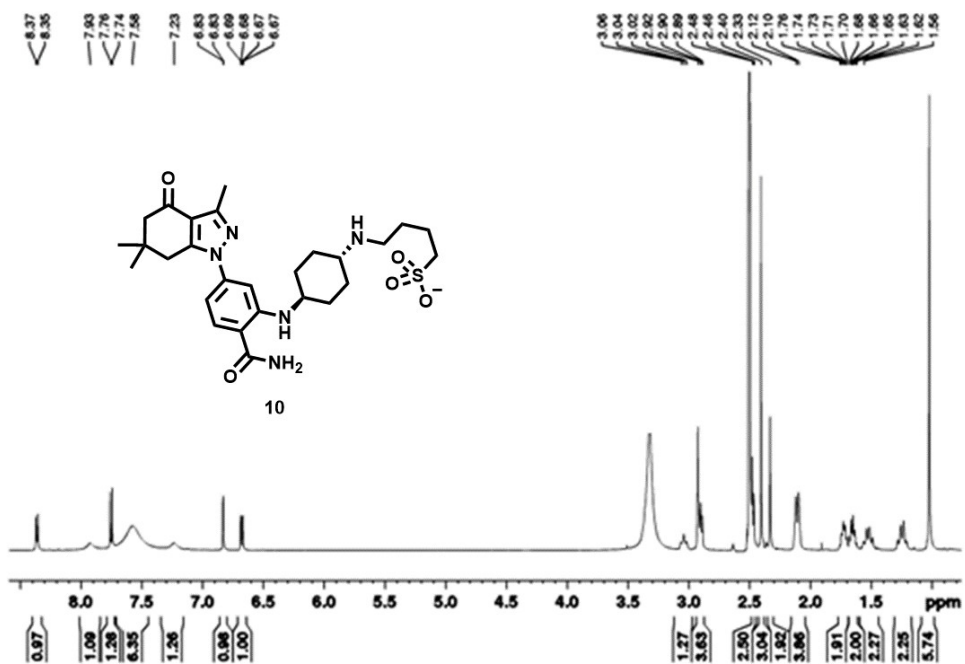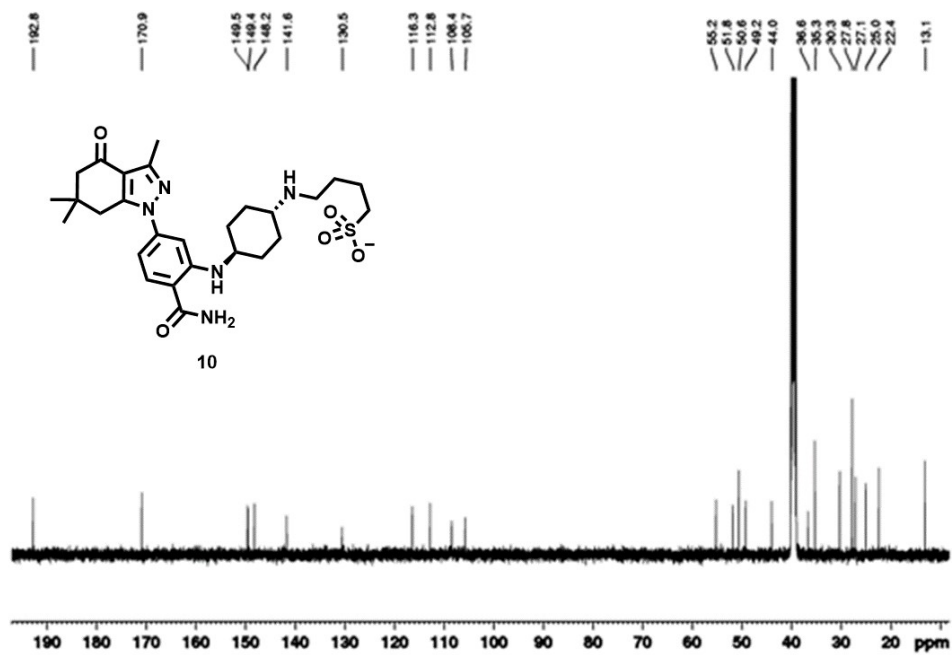

GSM 04-080d  
MS\_Direct\_211122\_6LC

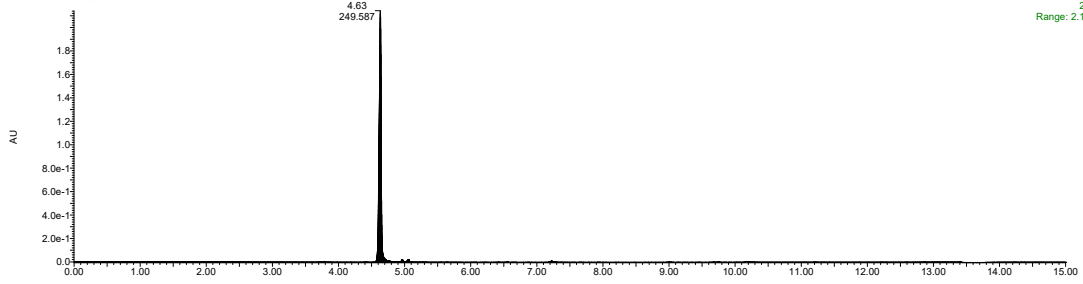

4: Diode Array  
290  
Range: 2.147

GSM 04-080d  
MS\_Direct\_211122\_4\_14 (0.107) Cm (12.22)

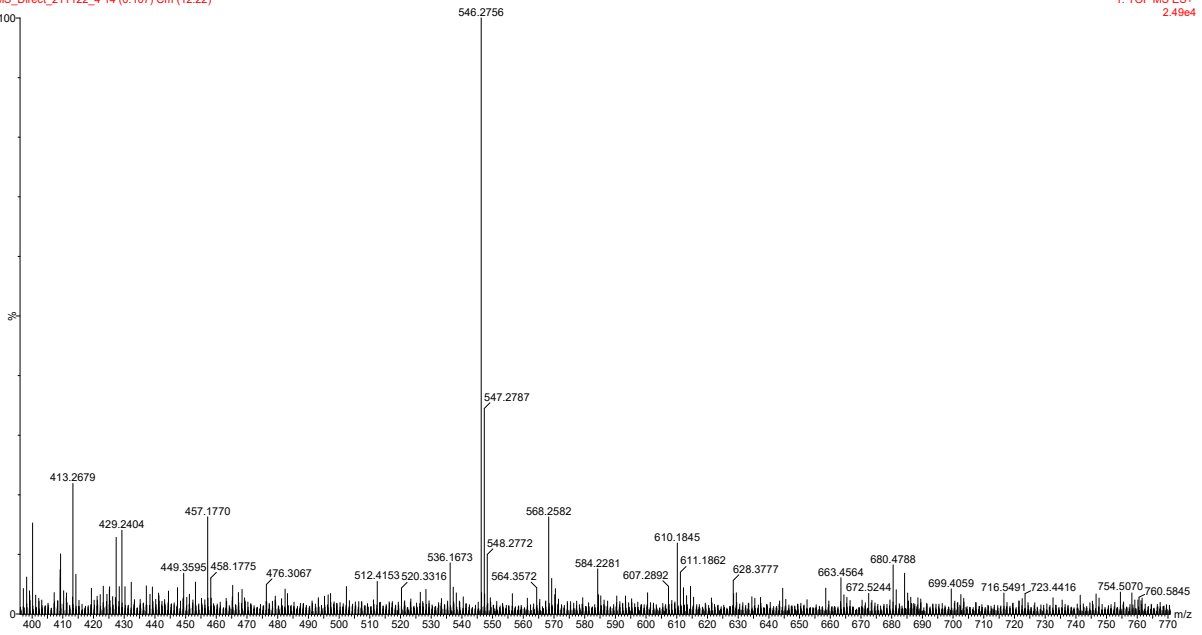

1: TOF MS ES+  
2.49e4

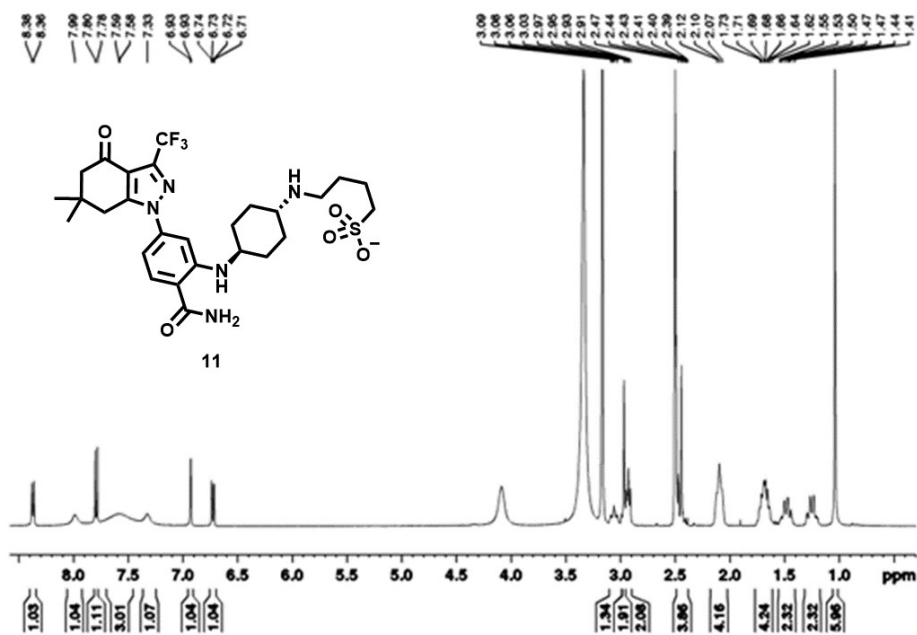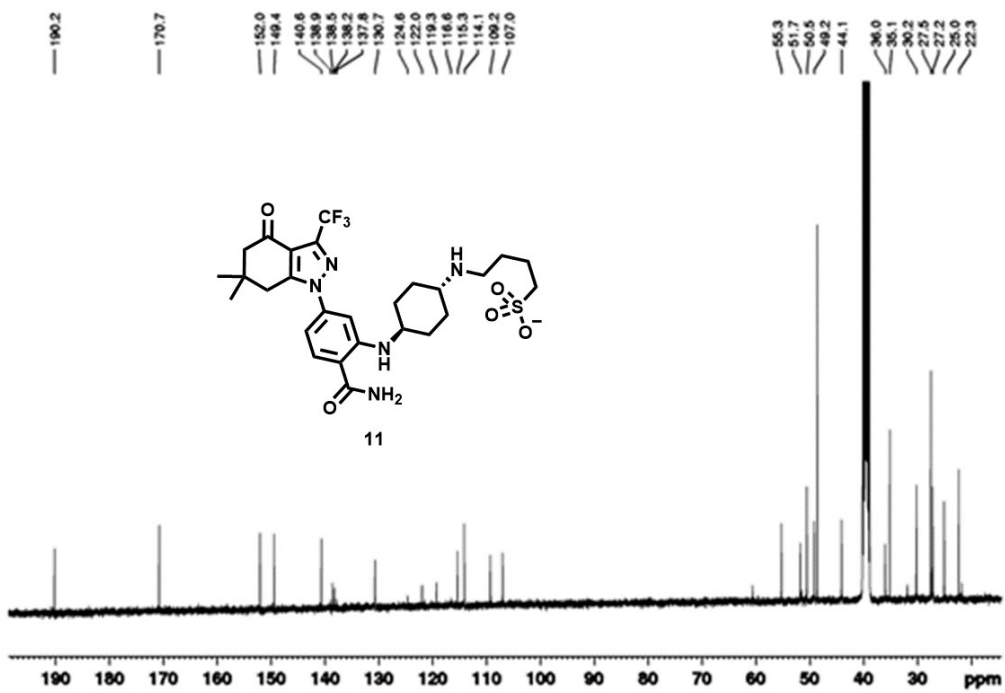

GSM 04-100  
CV\_UCT\_220315\_2

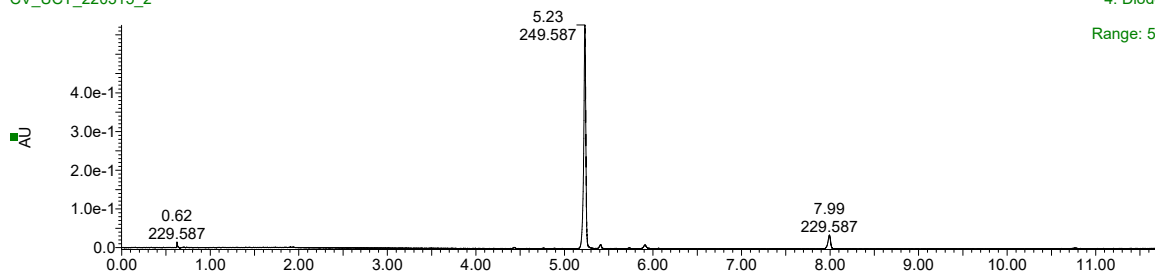

4: Diode Array  
280  
Range: 5.788e-1



GSM 04-100  
CV\_UCT\_220315\_2 685 (5.256)

1: TOF MS ES+  
6.59e4

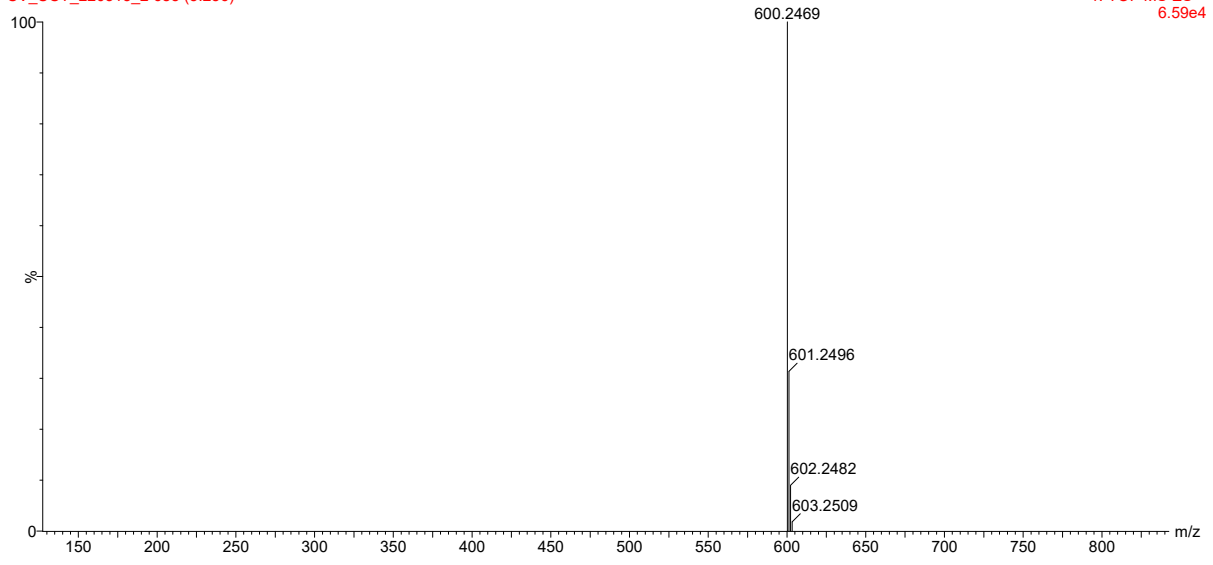

Supplement: d4md00501e1.pdf [file d4md00501e1.pdf]
